# Supplementary material
Source: publisher site journal article supplement (https://www.spandidos-publications.com/2278/downloadSupplementary)
Supplement: Supplementary file 1 [file downloadSupplementary]

## Sheet: list of miRNA and target gene
Table SIV. Target genes of microRNAs from the mesenchymal stem cell treatment group predicted by TargetScan and miRanda.
miRNA	Gene symbol
hsa-let-7i-5p	AAK1
hsa-let-7a-5p	AAK1
hsa-miR-149-3p	AAK1
hsa-miR-17-5p	AAK1
hsa-miR-106a-5p	AAK1
hsa-miR-762	AAK1
hsa-let-7i-5p	AASS
hsa-miR-7150	AATK
hsa-miR-92b-3p	AATK
hsa-miR-17-5p	ABCA1
hsa-miR-27b-3p	ABCA1
hsa-miR-106a-5p	ABCA1
hsa-miR-6510-5p	ABCA2
hsa-let-7i-5p	ABCB9
hsa-let-7a-5p	ABCB9
hsa-miR-7-5p	ABCC1
hsa-let-7i-5p	ABCC10
hsa-let-7a-5p	ABCC10
hsa-let-7i-5p	ABCC5
hsa-let-7a-5p	ABCC5
hsa-miR-30c-5p	ABCC9
hsa-miR-374b-5p	ABCE1
hsa-miR-762	ABCF2
hsa-miR-17-5p	ABCG4
hsa-miR-106a-5p	ABCG4
hsa-miR-762	ABCG4
hsa-miR-762	ABHD14B
hsa-miR-149-3p	ABHD2
hsa-miR-6510-5p	ABHD2
hsa-miR-17-5p	ABHD2
hsa-miR-106a-5p	ABHD2
hsa-miR-17-5p	ABHD5
hsa-miR-27b-3p	ABHD5
hsa-miR-106a-5p	ABHD5
hsa-miR-7-5p	ABI2
hsa-let-7i-5p	ABL2
hsa-let-7a-5p	ABL2
hsa-miR-17-5p	ABL2
hsa-miR-106a-5p	ABL2
hsa-miR-4267	ABR
hsa-miR-762	ABR
hsa-miR-17-5p	ACAP2
hsa-miR-106a-5p	ACAP2
hsa-miR-149-3p	ACCN2
hsa-miR-27b-3p	ACE
hsa-let-7i-5p	ACER2
hsa-let-7a-5p	ACER2
hsa-miR-4690-5p	ACOX1
hsa-let-7a-5p	ACP1
hsa-miR-762	ACP2
hsa-miR-17-5p	ACPL2
hsa-miR-106a-5p	ACPL2
hsa-miR-150-5p	ACSL4
hsa-miR-106a-5p	ACSL4
hsa-miR-4267	ACSL5
hsa-let-7a-5p	ACSL6
hsa-let-7a-5p	ACTA1
hsa-let-7a-5p	ACTR10
hsa-miR-30c-5p	ACVR1
hsa-miR-150-5p	ACVR1B
hsa-miR-22-3p	ACVR1B
hsa-miR-762	ACVR1B
hsa-miR-27b-3p	ACVR1C
hsa-let-7a-5p	ACVR2A
hsa-miR-27b-3p	ACVR2A
hsa-miR-374b-5p	ACVR2B
hsa-miR-22-3p	ACVR2B
hsa-miR-4690-5p	ACVRL1
hsa-miR-762	ACVRL1
hsa-miR-22-3p	ADAM11
hsa-miR-92b-3p	ADAM19
hsa-miR-17-5p	ADAM9
hsa-miR-106a-5p	ADAM9
hsa-miR-4267	ADAMTS10
hsa-let-7i-5p	ADAMTS14
hsa-let-7a-5p	ADAMTS14
hsa-miR-762	ADAMTS14
hsa-miR-7150	ADAMTS19
hsa-miR-1246	ADAMTS6
hsa-miR-27b-3p	ADAMTS6
hsa-let-7i-5p	ADAMTS8
hsa-miR-149-3p	ADAMTSL1
hsa-miR-150-5p	ADARB1
hsa-miR-22-3p	ADCK2
hsa-miR-149-3p	ADCY1
hsa-miR-27b-3p	ADCY3
hsa-miR-22-3p	ADCY6
hsa-miR-27b-3p	ADCY6
hsa-miR-7-5p	ADCY9
hsa-miR-149-3p	ADCYAP1R1
hsa-miR-27b-3p	ADD1
hsa-miR-17-5p	ADIPOR2
hsa-miR-106a-5p	ADIPOR2
hsa-miR-92b-3p	ADM
hsa-miR-27b-3p	ADORA2B
hsa-miR-17-5p	ADRA1B
hsa-miR-106a-5p	ADRA1B
hsa-miR-149-3p	ADRBK1
hsa-let-7a-5p	ADRBK2
hsa-miR-6510-5p	AFF1
hsa-miR-92b-3p	AFF1
hsa-miR-17-5p	AFF2
hsa-miR-106a-5p	AFF2
hsa-miR-27b-3p	AFF3
hsa-miR-30c-5p	AFF3
hsa-miR-30c-5p	AFF4
hsa-miR-149-3p	AGAP2
hsa-miR-762	AGAP2
hsa-miR-149-3p	AGAP3
hsa-miR-149-3p	AGBL5
hsa-miR-22-3p	AGBL5
hsa-miR-17-5p	AGFG2
hsa-miR-106a-5p	AGFG2
hsa-miR-4443	AGPAT4
hsa-let-7i-5p	AGPAT6
hsa-miR-7-5p	AGPS
hsa-miR-149-3p	AIF1L
hsa-miR-762	AK1
hsa-miR-17-5p	AKAP11
hsa-miR-106a-5p	AKAP11
hsa-miR-4690-5p	AKAP13
hsa-let-7i-5p	AKAP5
hsa-miR-7150	AKAP5
hsa-let-7i-5p	AKAP6
hsa-let-7a-5p	AKAP6
hsa-miR-27b-3p	AKIRIN1
hsa-let-7i-5p	AKT2
hsa-let-7a-5p	AKT2
hsa-miR-17-5p	AKTIP
hsa-miR-106a-5p	AKTIP
hsa-miR-17-5p	ALDH1A3
hsa-miR-106a-5p	ALDH1A3
hsa-miR-27b-3p	ALDH1L2
hsa-miR-762	ALDH4A1
hsa-miR-7150	ALDH7A1
hsa-miR-27b-3p	ALG9
hsa-miR-30c-5p	ALG9
hsa-miR-762	ALKBH7
hsa-let-7i-5p	ALPK3
hsa-miR-4267	ALPK3
hsa-miR-149-3p	ALPL
hsa-miR-30c-5p	ALS2CR8
hsa-miR-4443	ALX3
hsa-miR-149-3p	ALX4
hsa-miR-6510-5p	ALX4
hsa-miR-17-5p	ALX4
hsa-miR-106a-5p	ALX4
hsa-miR-7-5p	AMBRA1
hsa-let-7i-5p	AMMECR1L
hsa-let-7a-5p	AMMECR1L
hsa-miR-4690-5p	AMMECR1L
hsa-miR-22-3p	AMMECR1L
hsa-miR-27b-3p	AMMECR1L
hsa-let-7i-5p	AMOT
hsa-let-7a-5p	AMOT
hsa-miR-7150	AMOTL2
hsa-let-7a-5p	AMT
hsa-miR-149-3p	ANGEL1
hsa-miR-150-5p	ANGEL1
hsa-miR-22-3p	ANGEL2
hsa-miR-4267	ANK1
hsa-miR-27b-3p	ANK2
hsa-miR-92b-3p	ANK3
hsa-miR-1246	ANKFY1
hsa-let-7a-5p	ANKFY1
hsa-miR-17-5p	ANKFY1
hsa-miR-7-5p	ANKFY1
hsa-miR-106a-5p	ANKFY1
hsa-miR-106a-5p	ANKH
hsa-miR-17-5p	ANKIB1
hsa-miR-92b-3p	ANKIB1
hsa-miR-106a-5p	ANKIB1
hsa-miR-30c-5p	ANKRA2
hsa-miR-17-5p	ANKRD12
hsa-miR-7-5p	ANKRD12
hsa-miR-106a-5p	ANKRD12
hsa-miR-149-3p	ANKRD13B
hsa-miR-762	ANKRD13B
hsa-miR-142-5p	ANKRD17
hsa-miR-17-5p	ANKRD29
hsa-miR-106a-5p	ANKRD29
hsa-miR-149-3p	ANKRD40
hsa-miR-27b-3p	ANKRD40
hsa-let-7i-5p	ANKRD46
hsa-let-7a-5p	ANKRD46
hsa-let-7i-5p	ANKRD49
hsa-let-7a-5p	ANKRD49
hsa-miR-17-5p	ANKRD50
hsa-miR-106a-5p	ANKRD50
hsa-let-7a-5p	ANKRD52
hsa-miR-149-3p	ANKRD52
hsa-miR-150-5p	ANKRD52
hsa-miR-6510-5p	ANKRD52
hsa-miR-17-5p	ANKRD52
hsa-miR-22-3p	ANKRD52
hsa-miR-106a-5p	ANKRD52
hsa-miR-762	ANKRD52
hsa-miR-17-5p	ANKRD9
hsa-miR-106a-5p	ANKRD9
hsa-miR-27b-3p	ANKS1A
hsa-miR-17-5p	ANO6
hsa-miR-106a-5p	ANO6
hsa-miR-149-3p	AP2A1
hsa-miR-4690-5p	AP3S2
hsa-miR-149-3p	AP3S2
hsa-let-7a-5p	AP4E1
hsa-let-7i-5p	APBA1
hsa-let-7a-5p	APBA1
hsa-miR-17-5p	APBB2
hsa-miR-22-3p	APBB2
hsa-miR-4690-5p	APC
hsa-miR-150-5p	APC
hsa-let-7i-5p	APC2
hsa-miR-149-3p	APLN
hsa-miR-762	APOOL
hsa-miR-27b-3p	APPBP2
hsa-miR-150-5p	APPL2
hsa-miR-149-3p	ARC
hsa-miR-7150	ARC
hsa-miR-149-3p	ARFGAP2
hsa-miR-27b-3p	ARFGEF1
hsa-miR-4267	ARFIP2
hsa-miR-22-3p	ARFIP2
hsa-miR-762	ARFIP2
hsa-miR-17-5p	ARHGAP1
hsa-miR-106a-5p	ARHGAP1
hsa-miR-17-5p	ARHGAP12
hsa-miR-106a-5p	ARHGAP12
hsa-let-7i-5p	ARHGAP20
hsa-let-7a-5p	ARHGAP20
hsa-miR-17-5p	ARHGAP26
hsa-let-7i-5p	ARHGAP28
hsa-let-7a-5p	ARHGAP28
hsa-miR-17-5p	ARHGEF10
hsa-miR-106a-5p	ARHGEF10
hsa-miR-17-5p	ARHGEF11
hsa-miR-106a-5p	ARHGEF11
hsa-miR-22-3p	ARHGEF12
hsa-let-7i-5p	ARHGEF15
hsa-miR-4267	ARHGEF15
hsa-miR-92b-3p	ARHGEF17
hsa-miR-17-5p	ARHGEF18
hsa-miR-106a-5p	ARHGEF18
hsa-miR-27b-3p	ARHGEF6
hsa-miR-17-5p	ARHGEF7
hsa-miR-106a-5p	ARHGEF7
hsa-miR-7-5p	ARID2
hsa-let-7i-5p	ARID3B
hsa-let-7a-5p	ARID3B
hsa-miR-7-5p	ARID4A
hsa-miR-17-5p	ARID4B
hsa-miR-106a-5p	ARID4B
hsa-miR-150-5p	ARIH2
hsa-miR-17-5p	ARL1
hsa-miR-106a-5p	ARL1
hsa-miR-30c-5p	ARL10
hsa-miR-30c-5p	ARL6IP6
hsa-miR-27b-3p	ARMC8
hsa-miR-22-3p	ARPC5
hsa-let-7a-5p	ARPP19
hsa-miR-762	ART5
hsa-miR-30c-5p	ASB3
hsa-miR-22-3p	ASB6
hsa-miR-17-5p	ASH1L
hsa-miR-106a-5p	ASH1L
hsa-miR-92b-3p	ASPH
hsa-miR-27b-3p	ASPH
hsa-miR-7-5p	ASXL1
hsa-miR-17-5p	ATAD2
hsa-miR-106a-5p	ATAD2
hsa-let-7i-5p	ATAD2B
hsa-miR-149-3p	ATF7
hsa-miR-762	ATF7
hsa-miR-146a-5p	ATG12
hsa-miR-17-5p	ATG2A
hsa-miR-106a-5p	ATG2A
hsa-miR-762	ATG2A
hsa-miR-17-5p	ATG2B
hsa-miR-106a-5p	ATG2B
hsa-let-7i-5p	ATG4B
hsa-miR-762	ATG4B
hsa-miR-17-5p	ATG7
hsa-miR-106a-5p	ATG7
hsa-miR-7150	ATG9A
hsa-miR-762	ATG9A
hsa-miR-17-5p	ATL3
hsa-miR-106a-5p	ATL3
hsa-miR-27b-3p	ATP10B
hsa-miR-17-5p	ATP11A
hsa-miR-106a-5p	ATP11A
hsa-miR-17-5p	ATP1A2
hsa-miR-106a-5p	ATP1A2
hsa-miR-142-5p	ATP1B1
hsa-miR-149-3p	ATP1B2
hsa-let-7i-5p	ATP2A2
hsa-let-7a-5p	ATP2A2
hsa-miR-4443	ATP2A2
hsa-miR-27b-3p	ATP2B1
hsa-miR-4690-5p	ATP2B2
hsa-miR-17-5p	ATP2B2
hsa-miR-7-5p	ATP2B2
hsa-miR-106a-5p	ATP2B2
hsa-miR-92b-3p	ATP7A
hsa-let-7i-5p	ATP8B4
hsa-let-7a-5p	ATP8B4
hsa-miR-7150	ATP9A
hsa-let-7i-5p	ATPAF1
hsa-let-7a-5p	ATPAF1
hsa-miR-762	ATPIF1
hsa-miR-4690-5p	ATRX
hsa-miR-17-5p	ATXN1
hsa-miR-7-5p	ATXN1
hsa-miR-30c-5p	ATXN1
hsa-miR-106a-5p	ATXN1
hsa-miR-27b-3p	ATXN10
hsa-miR-149-3p	ATXN2L
hsa-miR-7-5p	ATXN7
hsa-miR-92b-3p	ATXN7
hsa-let-7i-5p	AVEN
hsa-miR-30c-5p	AVL9
hsa-miR-7150	AXIN1
hsa-miR-92b-3p	AXL
hsa-let-7a-5p	B3GAT1
hsa-let-7a-5p	B3GAT3
hsa-let-7i-5p	B3GNT1
hsa-miR-30c-5p	B3GNT5
hsa-let-7i-5p	B3GNT7
hsa-let-7a-5p	B3GNT7
hsa-miR-7150	B4GALNT1
hsa-miR-27b-3p	B4GALT3
hsa-miR-106a-5p	B4GALT6
hsa-miR-7-5p	BACE1
hsa-let-7i-5p	BACE2
hsa-let-7i-5p	BACH1
hsa-let-7a-5p	BACH1
hsa-miR-27b-3p	BAG2
hsa-miR-92b-3p	BAHCC1
hsa-miR-7150	BAHD1
hsa-miR-27b-3p	BAHD1
hsa-miR-17-5p	BAMBI
hsa-miR-106a-5p	BAMBI
hsa-miR-149-3p	BARX2
hsa-miR-150-5p	BASP1
hsa-miR-22-3p	BATF3
hsa-miR-762	BAZ1B
hsa-miR-4734	BAZ2A
hsa-miR-149-3p	BAZ2A
hsa-miR-6510-5p	BAZ2A
hsa-miR-7150	BAZ2A
hsa-miR-92b-3p	BAZ2B
hsa-miR-149-3p	BCAM
hsa-let-7i-5p	BCAP29
hsa-let-7a-5p	BCAP29
hsa-miR-374b-5p	BCAP29
hsa-miR-7-5p	BCAP29
hsa-let-7i-5p	BCAT1
hsa-let-7a-5p	BCAT1
hsa-miR-149-3p	BCL2L11
hsa-miR-6510-5p	BCL2L11
hsa-miR-17-5p	BCL2L11
hsa-miR-30c-5p	BCL2L11
hsa-miR-106a-5p	BCL2L11
hsa-miR-17-5p	BCL2L2
hsa-miR-106a-5p	BCL2L2
hsa-miR-22-3p	BCL6B
hsa-miR-22-3p	BCL9
hsa-miR-7150	BCL9L
hsa-miR-22-3p	BCL9L
hsa-miR-146a-5p	BCORL1
hsa-miR-17-5p	BCR
hsa-miR-7-5p	BCR
hsa-miR-106a-5p	BCR
hsa-miR-30c-5p	BDNF
hsa-miR-27b-3p	BEND3
hsa-miR-1246	BEND4
hsa-let-7i-5p	BEND4
hsa-let-7a-5p	BEND4
hsa-miR-146a-5p	BEND4
hsa-miR-27b-3p	BEND4
hsa-miR-27b-3p	BHLHE41
hsa-miR-7150	BICD2
hsa-miR-4734	BIN1
hsa-miR-22-3p	BIN1
hsa-let-7i-5p	BIN3
hsa-miR-149-3p	BMF
hsa-miR-27b-3p	BMI1
hsa-miR-149-3p	BMP1
hsa-miR-17-5p	BMPR2
hsa-miR-7-5p	BMPR2
hsa-miR-106a-5p	BMPR2
hsa-miR-17-5p	BNC2
hsa-miR-17-5p	BNIP2
hsa-miR-106a-5p	BNIP2
hsa-miR-17-5p	BNIP3L
hsa-miR-22-3p	BOLL
hsa-miR-6510-5p	BPTF
hsa-miR-762	BPTF
hsa-miR-7-5p	BRCA1
hsa-miR-4267	BRD2
hsa-let-7i-5p	BRD3
hsa-miR-6510-5p	BRD3
hsa-miR-762	BRD3
hsa-let-7a-5p	BRF2
hsa-miR-6510-5p	BRPF1
hsa-let-7a-5p	BRWD1
hsa-miR-7-5p	BRWD1
hsa-miR-22-3p	BRWD3
hsa-miR-27b-3p	BRWD3
hsa-miR-149-3p	BSN
hsa-miR-150-5p	BSN
hsa-miR-6510-5p	BSN
hsa-miR-762	BSN
hsa-miR-149-3p	BTBD6
hsa-miR-17-5p	BTBD7
hsa-miR-106a-5p	BTBD7
hsa-let-7i-5p	BTBD9
hsa-miR-762	BTBD9
hsa-miR-4267	BTG2
hsa-miR-92b-3p	BTG2
hsa-miR-27b-3p	BTG2
hsa-miR-17-5p	BVES
hsa-miR-106a-5p	BVES
hsa-let-7a-5p	BZW1
hsa-miR-7150	C1QTNF7
hsa-miR-27b-3p	C2CD2
hsa-miR-149-3p	C2CD2L
hsa-miR-22-3p	C2CD2L
hsa-miR-27b-3p	CA12
hsa-miR-7-5p	CA7
hsa-miR-17-5p	CABLES1
hsa-miR-7150	CABLES1
hsa-miR-106a-5p	CABLES1
hsa-miR-27b-3p	CABLES2
hsa-miR-30c-5p	CACNA1C
hsa-miR-92b-3p	CACNA1I
hsa-miR-4690-5p	CACNB1
hsa-miR-149-3p	CACNB1
hsa-miR-762	CACNB3
hsa-miR-7-5p	CACNB4
hsa-miR-27b-3p	CACYBP
hsa-miR-3656	CADM3
hsa-miR-149-3p	CADM3
hsa-miR-762	CADM3
hsa-miR-150-5p	CALCR
hsa-miR-22-3p	CALCR
hsa-miR-1246	CALM2
hsa-miR-762	CALM3
hsa-miR-6510-5p	CALML4
hsa-miR-7-5p	CALU
hsa-miR-4690-5p	CAMK1G
hsa-miR-7150	CAMK2A
hsa-miR-4267	CAMK2A
hsa-miR-149-3p	CAMK2B
hsa-miR-7-5p	CAMK2D
hsa-miR-762	CAMK2G
hsa-miR-17-5p	CAMK2N2
hsa-miR-106a-5p	CAMK2N2
hsa-miR-149-3p	CAMKK1
hsa-miR-4443	CAMKK1
hsa-miR-4690-5p	CAMKK2
hsa-miR-762	CAMKV
hsa-miR-7150	CAMTA1
hsa-miR-17-5p	CAMTA2
hsa-miR-106a-5p	CAMTA2
hsa-let-7i-5p	CANT1
hsa-let-7a-5p	CANT1
hsa-miR-22-3p	CAPN1
hsa-miR-27b-3p	CAPN7
hsa-miR-17-5p	CAPRIN2
hsa-miR-106a-5p	CAPRIN2
hsa-miR-27b-3p	CASC3
hsa-let-7i-5p	CASK
hsa-let-7i-5p	CASP3
hsa-miR-1246	CAV1
hsa-miR-22-3p	CAV3
hsa-miR-6510-5p	CBFA2T2
hsa-miR-4443	CBFA2T2
hsa-let-7i-5p	CBFA2T3
hsa-let-7i-5p	CBL
hsa-let-7a-5p	CBL
hsa-miR-149-3p	CBL
hsa-miR-150-5p	CBL
hsa-miR-22-3p	CBL
hsa-miR-149-3p	CBX2
hsa-let-7a-5p	CBX5
hsa-miR-6510-5p	CBX5
hsa-miR-7150	CBX5
hsa-miR-762	CBX5
hsa-miR-149-3p	CBX6
hsa-miR-22-3p	CBX6
hsa-miR-762	CBX7
hsa-miR-17-5p	CC2D1A
hsa-miR-106a-5p	CC2D1A
hsa-miR-146a-5p	CCBP2
hsa-miR-149-3p	CCDC105
hsa-miR-27b-3p	CCDC120
hsa-miR-27b-3p	CCDC149
hsa-miR-17-5p	CCDC25
hsa-miR-106a-5p	CCDC25
hsa-miR-22-3p	CCDC47
hsa-miR-4690-5p	CCDC48
hsa-miR-17-5p	CCDC50
hsa-miR-106a-5p	CCDC50
hsa-miR-146a-5p	CCDC6
hsa-let-7i-5p	CCDC76
hsa-let-7a-5p	CCDC76
hsa-miR-7-5p	CCDC76
hsa-miR-27b-3p	CCDC85C
hsa-let-7i-5p	CCDC93
hsa-let-7a-5p	CCDC93
hsa-miR-106a-5p	CCL1
hsa-miR-150-5p	CCL5
hsa-miR-92b-3p	CCNC
hsa-miR-106a-5p	CCND1
hsa-miR-17-5p	CCND2
hsa-miR-92b-3p	CCNE2
hsa-let-7i-5p	CCNF
hsa-miR-17-5p	CCNJ
hsa-let-7a-5p	CCNJL
hsa-miR-22-3p	CCNJL
hsa-miR-7-5p	CCNT2
hsa-let-7i-5p	CCR7
hsa-let-7i-5p	CD200R1
hsa-miR-27b-3p	CD28
hsa-miR-149-3p	CD300LG
hsa-miR-6510-5p	CD34
hsa-miR-149-3p	CD3EAP
hsa-miR-92b-3p	CD69
hsa-miR-106a-5p	CD69
hsa-miR-4690-5p	CD81
hsa-miR-762	CD83
hsa-let-7i-5p	CD86
hsa-let-7a-5p	CD86
hsa-let-7i-5p	CDC14B
hsa-miR-7-5p	CDC14B
hsa-let-7a-5p	CDC25A
hsa-miR-27b-3p	CDC25B
hsa-let-7i-5p	CDC34
hsa-let-7a-5p	CDC34
hsa-miR-17-5p	CDC40
hsa-miR-106a-5p	CDC40
hsa-miR-27b-3p	CDC42BPB
hsa-miR-149-3p	CDC42EP2
hsa-miR-149-3p	CDC42EP4
hsa-let-7a-5p	CDC42SE1
hsa-miR-6510-5p	CDC42SE1
hsa-miR-762	CDC42SE1
hsa-miR-7150	CDCP1
hsa-miR-4443	CDH24
hsa-miR-27b-3p	CDH5
hsa-miR-150-5p	CDK5R1
hsa-miR-27b-3p	CDK6
hsa-miR-762	CDK6
hsa-let-7a-5p	CDKN1A
hsa-miR-22-3p	CDKN1A
hsa-miR-27b-3p	CDR2
hsa-miR-146a-5p	CDS1
hsa-miR-27b-3p	CDS1
hsa-let-7i-5p	CDV3
hsa-let-7a-5p	CDV3
hsa-let-7i-5p	CECR6
hsa-miR-27b-3p	CECR6
hsa-miR-7150	CELSR1
hsa-miR-762	CELSR3
hsa-miR-17-5p	CENPQ
hsa-miR-106a-5p	CENPQ
hsa-miR-22-3p	CENPV
hsa-let-7a-5p	CEP120
hsa-let-7i-5p	CEP135
hsa-miR-30c-5p	CEP350
hsa-miR-17-5p	CEP57
hsa-miR-106a-5p	CEP57
hsa-let-7a-5p	CERCAM
hsa-miR-7150	CFL1
hsa-miR-17-5p	CFL2
hsa-miR-30c-5p	CFL2
hsa-miR-106a-5p	CFL2
hsa-let-7a-5p	CGNL1
hsa-miR-6510-5p	CHAC1
hsa-miR-17-5p	CHAF1A
hsa-miR-106a-5p	CHAF1A
hsa-miR-150-5p	CHD2
hsa-let-7i-5p	CHD4
hsa-miR-17-5p	CHD5
hsa-miR-106a-5p	CHD5
hsa-miR-762	CHD5
hsa-miR-17-5p	CHD9
hsa-miR-30c-5p	CHD9
hsa-miR-106a-5p	CHD9
hsa-miR-22-3p	CHGA
hsa-let-7a-5p	CHIC1
hsa-miR-17-5p	CHIC1
hsa-miR-106a-5p	CHIC1
hsa-miR-92b-3p	CHMP7
hsa-let-7a-5p	CHRD
hsa-miR-4443	CHRDL1
hsa-miR-149-3p	CHRM1
hsa-miR-6510-5p	CHRM1
hsa-miR-4443	CHRNB2
hsa-miR-149-3p	CHRNE
hsa-miR-6510-5p	CHRNE
hsa-miR-149-3p	CHST1
hsa-miR-30c-5p	CHST1
hsa-miR-92b-3p	CHST7
hsa-let-7i-5p	CHUK
hsa-miR-149-3p	CIC
hsa-miR-142-5p	CIC
hsa-miR-22-3p	CIITA
hsa-miR-17-5p	CIT
hsa-miR-106a-5p	CIT
hsa-miR-7-5p	CKAP4
hsa-let-7i-5p	CLASP2
hsa-let-7i-5p	CLCN5
hsa-let-7a-5p	CLCN5
hsa-miR-7150	CLCN5
hsa-miR-762	CLCNKA
hsa-miR-762	CLCNKB
hsa-let-7a-5p	CLDN12
hsa-miR-7150	CLDN19
hsa-miR-22-3p	CLIC4
hsa-miR-4443	CLIC5
hsa-miR-149-3p	CLIP2
hsa-miR-762	CLIP3
hsa-miR-1246	CLLU1
hsa-miR-7150	CLMN
hsa-miR-30c-5p	CLN8
hsa-miR-106a-5p	CLOCK
hsa-let-7i-5p	CLP1
hsa-miR-22-3p	CLPB
hsa-miR-27b-3p	CLPP
hsa-miR-149-3p	CLSTN1
hsa-miR-762	CMIP
hsa-miR-17-5p	CMTM4
hsa-miR-27b-3p	CMTM4
hsa-miR-106a-5p	CMTM4
hsa-let-7i-5p	CMTM6
hsa-let-7a-5p	CMTM6
hsa-miR-17-5p	CNGB3
hsa-miR-106a-5p	CNGB3
hsa-miR-149-3p	CNIH2
hsa-miR-762	CNIH2
hsa-miR-17-5p	CNN1
hsa-miR-106a-5p	CNN1
hsa-miR-762	CNN1
hsa-miR-149-3p	CNNM1
hsa-miR-17-5p	CNNM3
hsa-miR-106a-5p	CNNM3
hsa-let-7i-5p	CNOT2
hsa-miR-149-3p	CNOT3
hsa-miR-17-5p	CNOT4
hsa-miR-106a-5p	CNOT4
hsa-miR-30c-5p	CNOT6
hsa-miR-149-3p	CNOT6L
hsa-miR-7-5p	CNOT8
hsa-miR-149-3p	CNP
hsa-miR-762	CNP
hsa-miR-17-5p	CNRIP1
hsa-miR-106a-5p	CNRIP1
hsa-miR-4690-5p	CNTD2
hsa-miR-7150	CNTN2
hsa-miR-30c-5p	CNTN2
hsa-miR-762	CNTNAP1
hsa-miR-27b-3p	COG7
hsa-let-7i-5p	COIL
hsa-let-7a-5p	COIL
hsa-miR-149-3p	COL11A2
hsa-miR-27b-3p	COL11A2
hsa-let-7i-5p	COL15A1
hsa-miR-17-5p	COL19A1
hsa-miR-106a-5p	COL19A1
hsa-miR-149-3p	COL1A1
hsa-miR-27b-3p	COL21A1
hsa-let-7i-5p	COL24A1
hsa-miR-30c-5p	COL25A1
hsa-let-7i-5p	COL4A2
hsa-let-7a-5p	COL4A2
hsa-miR-149-3p	COL4A4
hsa-let-7a-5p	COL4A6
hsa-let-7i-5p	COL5A2
hsa-miR-30c-5p	COL9A3
hsa-miR-27b-3p	COLQ
hsa-miR-7150	COMMD10
hsa-miR-22-3p	COPS7B
hsa-miR-149-3p	COPZ2
hsa-miR-17-5p	COQ2
hsa-miR-106a-5p	COQ2
hsa-miR-17-5p	CORO2B
hsa-miR-106a-5p	CORO2B
hsa-miR-4690-5p	COTL1
hsa-miR-762	COTL1
hsa-miR-17-5p	COX7A2L
hsa-miR-106a-5p	COX7A2L
hsa-let-7i-5p	CPA4
hsa-let-7i-5p	CPD
hsa-let-7a-5p	CPD
hsa-miR-762	CPD
hsa-let-7a-5p	CPEB1
hsa-miR-22-3p	CPEB1
hsa-miR-17-5p	CPEB3
hsa-miR-27b-3p	CPEB3
hsa-miR-106a-5p	CPEB3
hsa-miR-27b-3p	CPEB4
hsa-miR-30c-5p	CPEB4
hsa-miR-7-5p	CPLX2
hsa-miR-762	CPLX2
hsa-let-7a-5p	CPM
hsa-miR-762	CPNE5
hsa-miR-17-5p	CRAMP1L
hsa-miR-106a-5p	CRAMP1L
hsa-let-7i-5p	CRB2
hsa-let-7i-5p	CRCT1
hsa-let-7a-5p	CRCT1
hsa-miR-17-5p	CREB1
hsa-miR-106a-5p	CREB1
hsa-miR-4443	CREB1
hsa-miR-92b-3p	CREB3L2
hsa-miR-7150	CRELD1
hsa-miR-17-5p	CRIPT
hsa-miR-106a-5p	CRIPT
hsa-miR-4734	CRISPLD2
hsa-miR-17-5p	CRK
hsa-miR-106a-5p	CRK
hsa-miR-7-5p	CRLS1
hsa-miR-17-5p	CROT
hsa-miR-106a-5p	CROT
hsa-miR-149-3p	CRTC1
hsa-miR-762	CRTC1
hsa-miR-762	CRTC2
hsa-miR-17-5p	CRTC3
hsa-miR-106a-5p	CRTC3
hsa-miR-149-3p	CRY2
hsa-miR-7-5p	CRY2
hsa-miR-4443	CSDC2
hsa-miR-22-3p	CSF1R
hsa-miR-4690-5p	CSNK1A1
hsa-miR-149-3p	CSNK1G1
hsa-miR-17-5p	CSNK1G1
hsa-miR-7150	CSNK1G1
hsa-miR-27b-3p	CSNK1G1
hsa-miR-106a-5p	CSNK1G1
hsa-miR-149-3p	CSRNP3
hsa-miR-27b-3p	CSRP2
hsa-miR-27b-3p	CTCF
hsa-miR-762	CTDP1
hsa-miR-6510-5p	CTDSP1
hsa-miR-7150	CTDSP1
hsa-miR-27b-3p	CTDSP2
hsa-miR-7150	CTDSPL
hsa-miR-17-5p	CTDSPL2
hsa-miR-106a-5p	CTDSPL2
hsa-miR-4690-5p	CTF1
hsa-let-7a-5p	CTHRC1
hsa-let-7a-5p	CTNS
hsa-miR-17-5p	CTSA
hsa-miR-106a-5p	CTSA
hsa-miR-7-5p	CTSB
hsa-miR-30c-5p	CTTNBP2NL
hsa-miR-149-3p	CTXN1
hsa-miR-762	CUEDC1
hsa-miR-17-5p	CUL3
hsa-miR-22-3p	CUL3
hsa-miR-106a-5p	CUL3
hsa-miR-7-5p	CUL5
hsa-miR-4734	CUX1
hsa-miR-149-3p	CUX1
hsa-miR-762	CX3CL1
hsa-miR-106a-5p	CXCL14
hsa-miR-149-3p	CXCR5
hsa-miR-30c-5p	CYB561
hsa-let-7a-5p	CYB561D1
hsa-miR-149-3p	CYB561D1
hsa-miR-17-5p	CYBB
hsa-miR-106a-5p	CYBB
hsa-miR-6510-5p	CYBRD1
hsa-miR-17-5p	CYBRD1
hsa-miR-106a-5p	CYBRD1
hsa-let-7i-5p	CYP19A1
hsa-let-7a-5p	CYP19A1
hsa-miR-149-3p	CYP21A2
hsa-miR-149-3p	CYP26B1
hsa-miR-17-5p	CYP26B1
hsa-miR-7150	CYP26B1
hsa-miR-106a-5p	CYP26B1
hsa-miR-7150	CYP27B1
hsa-let-7a-5p	CYP46A1
hsa-miR-22-3p	CYR61
hsa-miR-150-5p	CYTH3
hsa-miR-22-3p	CYTH3
hsa-miR-7704	DAGLA
hsa-miR-4690-5p	DAGLA
hsa-miR-7150	DAGLA
hsa-miR-4267	DAGLA
hsa-miR-30c-5p	DAGLA
hsa-let-7i-5p	DAPK1
hsa-miR-17-5p	DAPK2
hsa-miR-106a-5p	DAPK2
hsa-miR-7-5p	DAZAP2
hsa-miR-762	DBNDD1
hsa-miR-17-5p	DCBLD2
hsa-miR-106a-5p	DCBLD2
hsa-miR-92b-3p	DCP1A
hsa-miR-27b-3p	DCP1A
hsa-miR-30c-5p	DCP1A
hsa-miR-92b-3p	DCP2
hsa-let-7a-5p	DCUN1D2
hsa-let-7i-5p	DCUN1D3
hsa-miR-17-5p	DCUN1D3
hsa-miR-30c-5p	DCUN1D3
hsa-miR-106a-5p	DCUN1D3
hsa-miR-27b-3p	DCUN1D4
hsa-miR-6510-5p	DCX
hsa-miR-30c-5p	DCX
hsa-miR-17-5p	DDHD1
hsa-miR-106a-5p	DDHD1
hsa-let-7i-5p	DDI2
hsa-miR-22-3p	DDIT4
hsa-let-7i-5p	DDN
hsa-let-7a-5p	DDN
hsa-let-7i-5p	DDX19A
hsa-let-7a-5p	DDX19A
hsa-let-7i-5p	DDX19B
hsa-let-7a-5p	DDX19B
hsa-let-7i-5p	DDX26B
hsa-let-7a-5p	DDX26B
hsa-miR-7150	DDX3X
hsa-miR-149-3p	DDX54
hsa-miR-149-3p	DEDD
hsa-miR-17-5p	DEDD
hsa-miR-106a-5p	DEDD
hsa-miR-4690-5p	DEDD2
hsa-miR-17-5p	DEF8
hsa-miR-106a-5p	DEF8
hsa-miR-762	DEF8
hsa-miR-149-3p	DENND1A
hsa-miR-92b-3p	DENND4B
hsa-miR-17-5p	DENND5B
hsa-miR-106a-5p	DENND5B
hsa-miR-27b-3p	DEPDC1B
hsa-miR-149-3p	DERL3
hsa-miR-149-3p	DES
hsa-miR-30c-5p	DEXI
hsa-miR-7150	DGKA
hsa-miR-22-3p	DGKE
hsa-miR-4690-5p	DGKZ
hsa-miR-4267	DGKZ
hsa-miR-149-3p	DHRS11
hsa-miR-4267	DHTKD1
hsa-let-7i-5p	DHX57
hsa-let-7a-5p	DHX57
hsa-miR-762	DHX8
hsa-miR-4690-5p	DIAPH1
hsa-miR-6510-5p	DIAPH1
hsa-let-7i-5p	DICER1
hsa-let-7a-5p	DICER1
hsa-miR-27b-3p	DIDO1
hsa-miR-17-5p	DIP2A
hsa-miR-106a-5p	DIP2A
hsa-miR-142-5p	DIP2B
hsa-miR-7-5p	DIRAS1
hsa-miR-27b-3p	DIRAS1
hsa-miR-762	DIRAS1
hsa-miR-4267	DISC1
hsa-miR-27b-3p	DISC1
hsa-let-7i-5p	DKK3
hsa-miR-92b-3p	DKK3
hsa-miR-149-3p	DLG3
hsa-miR-92b-3p	DLG5
hsa-miR-22-3p	DLGAP2
hsa-miR-146a-5p	DLGAP2
hsa-miR-30c-5p	DLGAP2
hsa-miR-27b-3p	DLGAP3
hsa-miR-149-3p	DLGAP4
hsa-miR-4443	DLL4
hsa-let-7a-5p	DLST
hsa-miR-149-3p	DLX3
hsa-miR-17-5p	DMRTA2
hsa-miR-106a-5p	DMRTA2
hsa-miR-17-5p	DMTF1
hsa-miR-149-3p	DMWD
hsa-miR-7150	DMWD
hsa-miR-30c-5p	DMXL2
hsa-miR-92b-3p	DNAJB12
hsa-miR-149-3p	DNAJB2
hsa-miR-6510-5p	DNAJB2
hsa-miR-22-3p	DNAJB5
hsa-miR-17-5p	DNAJB6
hsa-miR-106a-5p	DNAJB6
hsa-miR-17-5p	DNAJC16
hsa-miR-106a-5p	DNAJC16
hsa-miR-6510-5p	DNAJC18
hsa-miR-17-5p	DNAJC27
hsa-miR-106a-5p	DNAJC27
hsa-miR-149-3p	DNAJC30
hsa-miR-762	DND1
hsa-miR-17-5p	DNM2
hsa-miR-106a-5p	DNM2
hsa-miR-22-3p	DNM3
hsa-miR-149-3p	DNMT3A
hsa-miR-7150	DNMT3A
hsa-let-7a-5p	DOCK3
hsa-miR-17-5p	DOCK4
hsa-miR-106a-5p	DOCK4
hsa-miR-6510-5p	DOCK5
hsa-miR-149-3p	DOK4
hsa-miR-27b-3p	DOT1L
hsa-miR-149-3p	DPF1
hsa-let-7i-5p	DPF2
hsa-miR-22-3p	DPF2
hsa-miR-17-5p	DPF3
hsa-miR-106a-5p	DPF3
hsa-miR-22-3p	DPM2
hsa-let-7i-5p	DPP3
hsa-miR-17-5p	DPP3
hsa-miR-106a-5p	DPP3
hsa-miR-149-3p	DPP6
hsa-miR-149-3p	DPP9
hsa-miR-30c-5p	DPY19L3
hsa-miR-7-5p	DPYSL2
hsa-miR-30c-5p	DPYSL2
hsa-miR-4690-5p	DPYSL5
hsa-miR-149-3p	DPYSL5
hsa-miR-17-5p	DPYSL5
hsa-miR-106a-5p	DPYSL5
hsa-miR-762	DPYSL5
hsa-miR-149-3p	DRG2
hsa-miR-92b-3p	DSCAML1
hsa-miR-149-3p	DSEL
hsa-let-7a-5p	DSG3
hsa-miR-17-5p	DSTYK
hsa-miR-30c-5p	DSTYK
hsa-miR-106a-5p	DSTYK
hsa-miR-7150	DTX3L
hsa-let-7a-5p	DTX4
hsa-miR-27b-3p	DTX4
hsa-miR-4690-5p	DUSP15
hsa-let-7i-5p	DUSP16
hsa-let-7a-5p	DUSP16
hsa-miR-149-3p	DUSP2
hsa-miR-4734	DUSP8
hsa-miR-27b-3p	DVL2
hsa-miR-149-3p	DVL3
hsa-miR-17-5p	DYNC1LI2
hsa-miR-106a-5p	DYNC1LI2
hsa-let-7i-5p	DYRK1A
hsa-let-7a-5p	DZIP1
hsa-miR-17-5p	E2F1
hsa-let-7i-5p	E2F2
hsa-let-7a-5p	E2F2
hsa-miR-4690-5p	E2F2
hsa-miR-17-5p	E2F2
hsa-miR-106a-5p	E2F2
hsa-miR-17-5p	E2F5
hsa-miR-106a-5p	E2F5
hsa-miR-146a-5p	EARS2
hsa-miR-150-5p	EBF3
hsa-miR-27b-3p	EBF3
hsa-miR-27b-3p	ECE2
hsa-miR-22-3p	EDA
hsa-miR-27b-3p	EDAR
hsa-miR-6510-5p	EDC3
hsa-miR-27b-3p	EDNRA
hsa-miR-30c-5p	EED
hsa-let-7i-5p	EEF2K
hsa-let-7a-5p	EEF2K
hsa-miR-149-3p	EFNA3
hsa-miR-6510-5p	EFNA5
hsa-miR-17-5p	EFNB1
hsa-miR-106a-5p	EFNB1
hsa-miR-7-5p	EGFR
hsa-miR-7150	EGLN2
hsa-miR-150-5p	EGR2
hsa-miR-149-3p	EHD2
hsa-miR-6510-5p	EHD2
hsa-miR-4690-5p	EHD3
hsa-miR-17-5p	EHD3
hsa-miR-106a-5p	EHD3
hsa-miR-7150	EI24
hsa-miR-7-5p	EIF2AK1
hsa-miR-6125	EIF2C1
hsa-let-7a-5p	EIF2C1
hsa-miR-17-5p	EIF2S1
hsa-miR-106a-5p	EIF2S1
hsa-let-7i-5p	EIF2S2
hsa-let-7a-5p	EIF2S2
hsa-miR-27b-3p	EIF2S2
hsa-miR-7-5p	EIF4EBP2
hsa-miR-762	EIF4G1
hsa-miR-27b-3p	EIF5
hsa-miR-17-5p	EIF5A2
hsa-miR-106a-5p	EIF5A2
hsa-miR-27b-3p	ELAVL2
hsa-miR-7150	ELAVL3
hsa-miR-762	ELAVL3
hsa-let-7i-5p	ELF4
hsa-let-7a-5p	ELF4
hsa-miR-149-3p	ELK1
hsa-miR-150-5p	ELK1
hsa-miR-762	ELK1
hsa-miR-17-5p	ELK4
hsa-miR-106a-5p	ELK4
hsa-miR-30c-5p	ELL
hsa-miR-149-3p	ELOVL1
hsa-miR-150-5p	ELOVL3
hsa-miR-6510-5p	ELOVL4
hsa-miR-7-5p	ELOVL7
hsa-miR-22-3p	EMILIN3
hsa-miR-27b-3p	EML1
hsa-miR-762	ENG
hsa-miR-762	ENOSF1
hsa-miR-27b-3p	ENPP1
hsa-miR-17-5p	ENPP5
hsa-miR-106a-5p	ENPP5
hsa-miR-150-5p	ENSA
hsa-miR-142-5p	ENTPD1
hsa-miR-762	ENTPD2
hsa-miR-17-5p	ENTPD4
hsa-miR-106a-5p	ENTPD4
hsa-let-7a-5p	ENTPD7
hsa-miR-7150	EP300
hsa-miR-17-5p	EPB41
hsa-miR-27b-3p	EPB41
hsa-miR-17-5p	EPB41L5
hsa-miR-106a-5p	EPB41L5
hsa-miR-7150	EPHA10
hsa-miR-17-5p	EPHA4
hsa-miR-106a-5p	EPHA4
hsa-miR-106a-5p	EPHA7
hsa-miR-762	EPHA8
hsa-miR-150-5p	EPHB2
hsa-miR-27b-3p	EPHB2
hsa-miR-149-3p	EPHB3
hsa-miR-762	EPHB3
hsa-miR-17-5p	EPHB4
hsa-miR-106a-5p	EPHB4
hsa-miR-17-5p	ERBB3
hsa-miR-22-3p	ERBB3
hsa-miR-106a-5p	ERBB3
hsa-miR-146a-5p	ERBB4
hsa-miR-6510-5p	ERC1
hsa-miR-762	ERC1
hsa-let-7i-5p	ERCC4
hsa-let-7a-5p	ERCC4
hsa-miR-17-5p	EREG
hsa-miR-106a-5p	EREG
hsa-miR-4690-5p	ERF
hsa-miR-149-3p	ERF
hsa-miR-92b-3p	ERGIC2
hsa-miR-149-3p	ERI3
hsa-miR-30c-5p	ERLIN1
hsa-miR-17-5p	ERO1LB
hsa-miR-106a-5p	ERO1LB
hsa-let-7i-5p	ESPL1
hsa-let-7a-5p	ESPL1
hsa-miR-149-3p	ESPN
hsa-miR-22-3p	ESR1
hsa-miR-150-5p	ETF1
hsa-let-7i-5p	ETNK1
hsa-miR-17-5p	ETV1
hsa-miR-22-3p	ETV1
hsa-miR-106a-5p	ETV1
hsa-miR-7150	ETV6
hsa-miR-7-5p	EXOSC2
hsa-miR-27b-3p	EYA1
hsa-miR-27b-3p	EYA4
hsa-let-7i-5p	EZH1
hsa-let-7a-5p	EZH1
hsa-miR-17-5p	EZH1
hsa-miR-106a-5p	EZH1
hsa-let-7i-5p	EZH2
hsa-let-7a-5p	EZH2
hsa-miR-7150	FA2H
hsa-miR-149-3p	FADS2
hsa-miR-762	FAF2
hsa-miR-30c-5p	FAHD1
hsa-miR-17-5p	FAIM2
hsa-miR-106a-5p	FAIM2
hsa-miR-4690-5p	FAM100A
hsa-miR-149-3p	FAM100A
hsa-miR-4690-5p	FAM102A
hsa-miR-17-5p	FAM102A
hsa-miR-106a-5p	FAM102A
hsa-let-7i-5p	FAM103A1
hsa-let-7a-5p	FAM103A1
hsa-let-7i-5p	FAM104A
hsa-let-7a-5p	FAM104A
hsa-miR-27b-3p	FAM105B
hsa-miR-17-5p	FAM116A
hsa-miR-106a-5p	FAM116A
hsa-miR-17-5p	FAM117A
hsa-miR-22-3p	FAM117A
hsa-miR-106a-5p	FAM117A
hsa-miR-92b-3p	FAM117B
hsa-let-7i-5p	FAM118A
hsa-miR-762	FAM123B
hsa-let-7i-5p	FAM123C
hsa-let-7a-5p	FAM123C
hsa-miR-30c-5p	FAM124A
hsa-miR-22-3p	FAM125B
hsa-miR-27b-3p	FAM125B
hsa-miR-27b-3p	FAM126A
hsa-miR-17-5p	FAM126B
hsa-miR-92b-3p	FAM126B
hsa-miR-27b-3p	FAM126B
hsa-miR-106a-5p	FAM126B
hsa-miR-17-5p	FAM129A
hsa-miR-106a-5p	FAM129A
hsa-miR-762	FAM129A
hsa-miR-149-3p	FAM131B
hsa-miR-4690-5p	FAM134A
hsa-miR-7-5p	FAM134A
hsa-miR-142-5p	FAM134A
hsa-miR-150-5p	FAM134C
hsa-miR-17-5p	FAM13A
hsa-miR-106a-5p	FAM13A
hsa-miR-149-3p	FAM155B
hsa-miR-7150	FAM155B
hsa-miR-4443	FAM155B
hsa-miR-762	FAM155B
hsa-miR-92b-3p	FAM160A2
hsa-miR-30c-5p	FAM160B1
hsa-miR-6510-5p	FAM163A
hsa-miR-7-5p	FAM168B
hsa-miR-4443	FAM168B
hsa-let-7i-5p	FAM178A
hsa-let-7a-5p	FAM178A
hsa-miR-17-5p	FAM18B2
hsa-miR-106a-5p	FAM18B2
hsa-miR-142-5p	FAM18B2
hsa-miR-146a-5p	FAM26E
hsa-miR-30c-5p	FAM40A
hsa-miR-17-5p	FAM40B
hsa-miR-106a-5p	FAM40B
hsa-miR-17-5p	FAM45A
hsa-miR-106a-5p	FAM45A
hsa-miR-6510-5p	FAM53B
hsa-miR-7150	FAM53C
hsa-miR-7-5p	FAM53C
hsa-miR-17-5p	FAM57A
hsa-miR-106a-5p	FAM57A
hsa-miR-762	FAM57B
hsa-miR-17-5p	FAM60A
hsa-miR-106a-5p	FAM60A
hsa-miR-92b-3p	FAM70A
hsa-miR-7-5p	FAM83A
hsa-let-7i-5p	FAM84B
hsa-let-7a-5p	FAM84B
hsa-miR-17-5p	FAM84B
hsa-miR-27b-3p	FAM84B
hsa-miR-106a-5p	FAM84B
hsa-miR-142-5p	FAM91A1
hsa-miR-762	FANCA
hsa-miR-92b-3p	FARP1
hsa-let-7a-5p	FAS
hsa-let-7a-5p	FASLG
hsa-miR-17-5p	FAT3
hsa-miR-106a-5p	FAT3
hsa-miR-92b-3p	FBN1
hsa-miR-22-3p	FBRS
hsa-miR-27b-3p	FBRSL1
hsa-let-7i-5p	FBXL12
hsa-miR-7-5p	FBXL14
hsa-miR-762	FBXL16
hsa-miR-7-5p	FBXL7
hsa-miR-149-3p	FBXO10
hsa-miR-17-5p	FBXO10
hsa-miR-27b-3p	FBXO10
hsa-miR-106a-5p	FBXO10
hsa-miR-762	FBXO2
hsa-miR-106a-5p	FBXO21
hsa-miR-7-5p	FBXO28
hsa-miR-146a-5p	FBXO28
hsa-miR-762	FBXO31
hsa-miR-17-5p	FBXO39
hsa-miR-106a-5p	FBXO39
hsa-miR-7150	FBXO41
hsa-miR-22-3p	FBXO41
hsa-miR-762	FBXO41
hsa-miR-27b-3p	FBXO45
hsa-miR-149-3p	FBXO46
hsa-miR-17-5p	FBXO48
hsa-miR-106a-5p	FBXO48
hsa-miR-17-5p	FBXW11
hsa-miR-7-5p	FBXW2
hsa-miR-22-3p	FBXW7
hsa-miR-27b-3p	FBXW7
hsa-miR-27b-3p	FCRL1
hsa-miR-142-5p	FEM1C
hsa-miR-149-3p	FGD1
hsa-miR-17-5p	FGD4
hsa-miR-106a-5p	FGD4
hsa-miR-17-5p	FGD5
hsa-miR-106a-5p	FGD5
hsa-let-7i-5p	FGD6
hsa-let-7a-5p	FGD6
hsa-let-7i-5p	FGF11
hsa-let-7a-5p	FGF11
hsa-miR-4690-5p	FGF14
hsa-miR-149-3p	FGF7
hsa-miR-149-3p	FGF8
hsa-miR-762	FGFR1
hsa-miR-22-3p	FGFR1OP2
hsa-miR-149-3p	FHDC1
hsa-miR-30c-5p	FHOD3
hsa-miR-149-3p	FIBCD1
hsa-miR-142-5p	FIGN
hsa-miR-149-3p	FKBP10
hsa-miR-149-3p	FKBP8
hsa-miR-7-5p	FLRT2
hsa-miR-27b-3p	FLRT3
hsa-miR-17-5p	FLT1
hsa-miR-106a-5p	FLT1
hsa-miR-762	FLT1
hsa-miR-149-3p	FMN1
hsa-miR-22-3p	FMNL2
hsa-miR-17-5p	FMNL3
hsa-miR-106a-5p	FMNL3
hsa-miR-22-3p	FNBP4
hsa-let-7i-5p	FNDC3A
hsa-let-7a-5p	FNDC3A
hsa-miR-17-5p	FNDC3A
hsa-miR-30c-5p	FNDC3A
hsa-miR-106a-5p	FNDC3A
hsa-miR-17-5p	FNDC3B
hsa-miR-106a-5p	FNDC3B
hsa-miR-27b-3p	FNDC4
hsa-miR-6125	FNDC5
hsa-miR-6510-5p	FNDC5
hsa-let-7i-5p	FNIP1
hsa-let-7a-5p	FNIP1
hsa-miR-92b-3p	FNIP1
hsa-miR-149-3p	FOSB
hsa-miR-7150	FOSB
hsa-miR-27b-3p	FOSB
hsa-miR-149-3p	FOSL2
hsa-miR-92b-3p	FOSL2
hsa-miR-4267	FOXI1
hsa-miR-149-3p	FOXJ2
hsa-miR-7150	FOXJ3
hsa-miR-17-5p	FOXK2
hsa-miR-106a-5p	FOXK2
hsa-let-7i-5p	FOXN3
hsa-miR-7704	FOXN3
hsa-miR-27b-3p	FOXN3
hsa-miR-27b-3p	FOXN4
hsa-miR-27b-3p	FOXO1
hsa-miR-6510-5p	FOXO4
hsa-miR-762	FOXO4
hsa-miR-22-3p	FOXP1
hsa-miR-92b-3p	FOXP2
hsa-miR-149-3p	FOXP4
hsa-let-7i-5p	FRAS1
hsa-let-7a-5p	FRAS1
hsa-miR-22-3p	FREM2
hsa-miR-17-5p	FRMD4A
hsa-miR-106a-5p	FRMD4A
hsa-let-7i-5p	FRMD4B
hsa-let-7a-5p	FRMD4B
hsa-miR-30c-5p	FRMD6
hsa-miR-149-3p	FRS2
hsa-miR-92b-3p	FRY
hsa-miR-146a-5p	FRYL
hsa-miR-27b-3p	FRYL
hsa-miR-22-3p	FTL
hsa-miR-17-5p	FTSJD1
hsa-miR-106a-5p	FTSJD1
hsa-miR-149-3p	FURIN
hsa-miR-17-5p	FURIN
hsa-miR-106a-5p	FURIN
hsa-miR-22-3p	FUT9
hsa-miR-149-3p	FXR2
hsa-miR-6510-5p	FXR2
hsa-miR-4443	FXYD7
hsa-miR-17-5p	FYCO1
hsa-miR-106a-5p	FYCO1
hsa-miR-17-5p	FZD3
hsa-miR-106a-5p	FZD3
hsa-let-7a-5p	FZD4
hsa-miR-150-5p	FZD4
hsa-miR-6510-5p	FZD4
hsa-miR-374b-5p	G2E3
hsa-miR-17-5p	GAB1
hsa-miR-27b-3p	GAB1
hsa-miR-106a-5p	GAB1
hsa-let-7a-5p	GAB2
hsa-miR-762	GAB2
hsa-miR-17-5p	GABBR1
hsa-miR-106a-5p	GABBR1
hsa-miR-22-3p	GABBR2
hsa-miR-17-5p	GABPB1
hsa-miR-106a-5p	GABPB1
hsa-miR-7-5p	GABRA1
hsa-miR-7150	GABRA3
hsa-let-7a-5p	GALC
hsa-let-7i-5p	GALE
hsa-let-7a-5p	GALE
hsa-let-7i-5p	GALNT1
hsa-miR-30c-5p	GALNT1
hsa-miR-7150	GALNT10
hsa-miR-146a-5p	GALNT10
hsa-let-7i-5p	GALNT2
hsa-miR-30c-5p	GALNT2
hsa-miR-30c-5p	GALNT3
hsa-miR-30c-5p	GALNT7
hsa-miR-4690-5p	GALNTL4
hsa-let-7i-5p	GAN
hsa-let-7a-5p	GAN
hsa-let-7i-5p	GAS7
hsa-let-7a-5p	GAS7
hsa-miR-92b-3p	GATA2
hsa-miR-27b-3p	GATA2
hsa-miR-762	GATAD2A
hsa-miR-22-3p	GATAD2B
hsa-miR-27b-3p	GATC
hsa-let-7a-5p	GATM
hsa-miR-22-3p	GATM
hsa-miR-27b-3p	GCA
hsa-miR-27b-3p	GCNT2
hsa-miR-17-5p	GDA
hsa-miR-106a-5p	GDA
hsa-let-7i-5p	GDAP2
hsa-let-7a-5p	GDAP2
hsa-miR-92b-3p	GDF11
hsa-let-7i-5p	GDF6
hsa-let-7a-5p	GDF6
hsa-miR-27b-3p	GDF6
hsa-miR-149-3p	GDI1
hsa-miR-149-3p	GFOD2
hsa-miR-762	GGA1
hsa-miR-17-5p	GIGYF1
hsa-miR-30c-5p	GIGYF1
hsa-miR-106a-5p	GIGYF1
hsa-miR-762	GIGYF1
hsa-miR-149-3p	GIGYF2
hsa-miR-22-3p	GIGYF2
hsa-let-7a-5p	GIPC1
hsa-miR-762	GIPC3
hsa-miR-4267	GIT1
hsa-miR-762	GIT1
hsa-miR-30c-5p	GJA1
hsa-let-7i-5p	GJC1
hsa-let-7a-5p	GJC1
hsa-miR-27b-3p	GK
hsa-miR-17-5p	GLDN
hsa-miR-106a-5p	GLDN
hsa-miR-22-3p	GLIPR2
hsa-miR-7150	GLIS1
hsa-miR-4267	GLIS2
hsa-miR-17-5p	GLIS3
hsa-miR-106a-5p	GLIS3
hsa-let-7i-5p	GLRX
hsa-miR-27b-3p	GLT25D2
hsa-miR-27b-3p	GLTP
hsa-miR-7-5p	GLTSCR1
hsa-miR-22-3p	GM2A
hsa-miR-17-5p	GMCL1
hsa-miR-4690-5p	GNAI2
hsa-miR-30c-5p	GNAI2
hsa-miR-762	GNAI2
hsa-miR-149-3p	GNAO1
hsa-miR-30c-5p	GNAO1
hsa-miR-149-3p	GNAT1
hsa-miR-17-5p	GNB5
hsa-miR-106a-5p	GNB5
hsa-miR-7150	GNG12
hsa-let-7i-5p	GNG5
hsa-miR-17-5p	GNPDA2
hsa-miR-106a-5p	GNPDA2
hsa-let-7i-5p	GNPTAB
hsa-let-7a-5p	GNPTAB
hsa-miR-1246	GNRHR
hsa-miR-17-5p	GNS
hsa-miR-92b-3p	GNS
hsa-miR-27b-3p	GNS
hsa-miR-106a-5p	GNS
hsa-miR-17-5p	GOLGA1
hsa-miR-3656	GOLGA7B
hsa-let-7i-5p	GOLT1B
hsa-let-7a-5p	GOLT1B
hsa-miR-17-5p	GOSR1
hsa-miR-106a-5p	GOSR1
hsa-miR-142-5p	GOSR1
hsa-miR-27b-3p	GOSR2
hsa-miR-27b-3p	GPAM
hsa-miR-149-3p	GPD1
hsa-miR-17-5p	GPD2
hsa-miR-106a-5p	GPD2
hsa-miR-22-3p	GPR107
hsa-miR-149-3p	GPR124
hsa-let-7i-5p	GPR137
hsa-let-7a-5p	GPR137
hsa-miR-17-5p	GPR137C
hsa-miR-106a-5p	GPR137C
hsa-miR-4690-5p	GPR162
hsa-miR-92b-3p	GPR180
hsa-miR-1246	GPR26
hsa-let-7i-5p	GPR26
hsa-miR-4690-5p	GPR26
hsa-miR-17-5p	GPR6
hsa-miR-106a-5p	GPR6
hsa-miR-149-3p	GPRC5A
hsa-miR-149-3p	GPRC5B
hsa-miR-4443	GPX3
hsa-miR-17-5p	GRAMD1A
hsa-miR-4267	GRAMD1A
hsa-miR-106a-5p	GRAMD1A
hsa-miR-30c-5p	GRAMD2
hsa-let-7i-5p	GREB1
hsa-let-7a-5p	GREB1
hsa-miR-7-5p	GREM1
hsa-miR-27b-3p	GREM1
hsa-miR-17-5p	GRHL2
hsa-miR-30c-5p	GRHL2
hsa-miR-106a-5p	GRHL2
hsa-miR-1246	GRIA1
hsa-miR-149-3p	GRIK5
hsa-miR-4734	GRIN1
hsa-miR-149-3p	GRIN1
hsa-miR-149-3p	GRIN2A
hsa-miR-7-5p	GRIN2A
hsa-miR-149-3p	GRINA
hsa-miR-762	GRINA
hsa-miR-7150	GRIP2
hsa-miR-762	GRM2
hsa-miR-149-3p	GRN
hsa-miR-7-5p	GRP
hsa-let-7i-5p	GRPEL2
hsa-let-7a-5p	GRPEL2
hsa-miR-146a-5p	GRSF1
hsa-miR-27b-3p	GRSF1
hsa-miR-142-5p	GRSF1
hsa-miR-149-3p	GSK3A
hsa-miR-150-5p	GSK3B
hsa-miR-7-5p	GSPT1
hsa-miR-27b-3p	GSPT1
hsa-miR-17-5p	GTDC1
hsa-miR-7150	GTDC1
hsa-miR-106a-5p	GTDC1
hsa-miR-150-5p	GTF3C2
hsa-miR-762	GTPBP1
hsa-miR-17-5p	GUCY1A3
hsa-miR-106a-5p	GUCY1A3
hsa-let-7a-5p	GYG2
hsa-miR-22-3p	H3F3B
hsa-miR-92b-3p	HAS2
hsa-miR-92b-3p	HAS3
hsa-miR-17-5p	HAUS8
hsa-miR-106a-5p	HAUS8
hsa-let-7i-5p	HBEGF
hsa-let-7a-5p	HBEGF
hsa-miR-7150	HBEGF
hsa-miR-17-5p	HBP1
hsa-miR-106a-5p	HBP1
hsa-miR-374b-5p	HCFC1
hsa-miR-7-5p	HCN1
hsa-miR-7150	HCN3
hsa-miR-17-5p	HCN4
hsa-miR-106a-5p	HCN4
hsa-miR-762	HCN4
hsa-miR-22-3p	HDAC4
hsa-miR-22-3p	HDAC8
hsa-miR-4690-5p	HDLBP
hsa-miR-7-5p	HDLBP
hsa-let-7i-5p	HDX
hsa-let-7a-5p	HDX
hsa-miR-7-5p	HECTD3
hsa-miR-17-5p	HEG1
hsa-miR-106a-5p	HEG1
hsa-miR-7-5p	HELLS
hsa-let-7a-5p	HELZ
hsa-miR-762	HEMK1
hsa-miR-30c-5p	HERC2
hsa-miR-7-5p	HERPUD2
hsa-miR-92b-3p	HERPUD2
hsa-miR-762	HES2
hsa-let-7a-5p	HIC2
hsa-miR-149-3p	HIC2
hsa-miR-146a-5p	HIC2
hsa-miR-17-5p	HIF1A
hsa-let-7i-5p	HIF1AN
hsa-miR-7150	HIF1AN
hsa-miR-762	HIF1AN
hsa-miR-27b-3p	HINT3
hsa-miR-27b-3p	HIP1
hsa-miR-4690-5p	HIPK1
hsa-miR-1246	HIPK2
hsa-let-7i-5p	HIPK2
hsa-miR-149-3p	HIPK2
hsa-miR-7-5p	HIPK2
hsa-miR-762	HIPK2
hsa-let-7i-5p	HLF
hsa-miR-17-5p	HLF
hsa-miR-106a-5p	HLF
hsa-miR-17-5p	HMBOX1
hsa-miR-106a-5p	HMBOX1
hsa-miR-4690-5p	HMG20A
hsa-miR-6510-5p	HMG20A
hsa-miR-762	HMG20A
hsa-let-7i-5p	HMGA1
hsa-let-7a-5p	HMGA1
hsa-let-7i-5p	HMGA2
hsa-let-7a-5p	HMGA2
hsa-miR-17-5p	HMGA2
hsa-miR-106a-5p	HMGA2
hsa-miR-17-5p	HMGB3
hsa-miR-27b-3p	HMGB3
hsa-miR-106a-5p	HMGB3
hsa-miR-7150	HMGCL
hsa-miR-762	HNF4A
hsa-miR-30c-5p	HNF4G
hsa-miR-30c-5p	HNRNPA3
hsa-miR-149-3p	HNRNPU
hsa-miR-17-5p	HOOK3
hsa-miR-106a-5p	HOOK3
hsa-miR-27b-3p	HORMAD2
hsa-miR-27b-3p	HOXA13
hsa-miR-17-5p	HOXB13
hsa-miR-106a-5p	HOXB13
hsa-miR-27b-3p	HOXB8
hsa-let-7a-5p	HOXC11
hsa-miR-762	HOXD1
hsa-miR-106a-5p	HP1BP3
hsa-miR-7-5p	HPCAL4
hsa-miR-4690-5p	HPSE2
hsa-miR-17-5p	HS2ST1
hsa-miR-7150	HS2ST1
hsa-miR-106a-5p	HS2ST1
hsa-miR-17-5p	HS3ST5
hsa-miR-106a-5p	HS3ST5
hsa-let-7a-5p	HTR1E
hsa-miR-4690-5p	HTR2C
hsa-let-7i-5p	HTR4
hsa-let-7a-5p	HTR4
hsa-miR-22-3p	HUNK
hsa-miR-27b-3p	HYOU1
hsa-miR-7150	ICA1
hsa-miR-30c-5p	ICK
hsa-let-7a-5p	ICMT
hsa-miR-17-5p	ICMT
hsa-miR-106a-5p	ICMT
hsa-let-7i-5p	ICOS
hsa-let-7a-5p	ICOS
hsa-miR-7-5p	IDE
hsa-miR-30c-5p	IDE
hsa-miR-7-5p	IDS
hsa-miR-30c-5p	IER2
hsa-miR-149-3p	IFFO2
hsa-let-7i-5p	IGDCC3
hsa-let-7a-5p	IGDCC3
hsa-let-7i-5p	IGDCC4
hsa-let-7a-5p	IGDCC4
hsa-let-7a-5p	IGF1
hsa-miR-6510-5p	IGF1
hsa-let-7i-5p	IGF1R
hsa-let-7a-5p	IGF1R
hsa-miR-7-5p	IGF1R
hsa-let-7i-5p	IGF2BP1
hsa-let-7a-5p	IGF2BP1
hsa-miR-149-3p	IGF2BP1
hsa-miR-150-5p	IGF2BP1
hsa-miR-17-5p	IGF2BP1
hsa-miR-7150	IGF2BP1
hsa-miR-106a-5p	IGF2BP1
hsa-miR-762	IGF2BP1
hsa-let-7i-5p	IGF2BP2
hsa-let-7a-5p	IGF2BP3
hsa-miR-762	IGFBP5
hsa-miR-27b-3p	IGLON5
hsa-miR-146a-5p	IGSF1
hsa-miR-7-5p	IGSF8
hsa-let-7i-5p	IKBKE
hsa-let-7a-5p	IKBKE
hsa-miR-92b-3p	IKZF2
hsa-miR-27b-3p	IKZF2
hsa-miR-30c-5p	IKZF2
hsa-miR-149-3p	IKZF4
hsa-miR-22-3p	IKZF4
hsa-let-7a-5p	IL10
hsa-let-7i-5p	IL13
hsa-let-7a-5p	IL13
hsa-miR-17-5p	IL1RAP
hsa-miR-106a-5p	IL1RAP
hsa-miR-17-5p	IL25
hsa-miR-106a-5p	IL25
hsa-miR-762	IL2RB
hsa-miR-149-3p	IL2RG
hsa-miR-106a-5p	IL8
hsa-miR-17-5p	ILDR1
hsa-miR-106a-5p	ILDR1
hsa-miR-149-3p	IMPA2
hsa-miR-6510-5p	INO80
hsa-miR-17-5p	INO80
hsa-miR-106a-5p	INO80
hsa-miR-17-5p	INO80D
hsa-miR-27b-3p	INO80D
hsa-miR-22-3p	INO80E
hsa-miR-7150	INPP5K
hsa-let-7i-5p	INSR
hsa-miR-27b-3p	INSR
hsa-miR-30c-5p	INTS2
hsa-miR-17-5p	INTS6
hsa-miR-106a-5p	INTS6
hsa-miR-17-5p	IP6K1
hsa-miR-7150	IP6K1
hsa-miR-22-3p	IP6K1
hsa-miR-762	IP6K1
hsa-miR-17-5p	IPMK
hsa-miR-106a-5p	IPMK
hsa-miR-7-5p	IPO11
hsa-miR-762	IPO5
hsa-miR-6510-5p	IPO7
hsa-miR-17-5p	IPO7
hsa-miR-22-3p	IPO7
hsa-miR-106a-5p	IPO7
hsa-let-7i-5p	IPO9
hsa-miR-17-5p	IQSEC1
hsa-miR-106a-5p	IQSEC1
hsa-miR-149-3p	IQSEC2
hsa-miR-17-5p	IQSEC2
hsa-miR-4267	IQSEC2
hsa-miR-106a-5p	IQSEC2
hsa-miR-762	IQSEC2
hsa-miR-146a-5p	IRAK1
hsa-miR-150-5p	IRAK2
hsa-miR-17-5p	IRAK4
hsa-miR-106a-5p	IRAK4
hsa-miR-6510-5p	IRF1
hsa-miR-17-5p	IRF1
hsa-miR-106a-5p	IRF1
hsa-miR-17-5p	IRF2BP2
hsa-miR-106a-5p	IRF2BP2
hsa-miR-27b-3p	IRF4
hsa-let-7a-5p	IRGQ
hsa-miR-149-3p	IRS1
hsa-miR-7-5p	IRS1
hsa-miR-27b-3p	IRS1
hsa-let-7i-5p	IRS2
hsa-let-7a-5p	IRS2
hsa-miR-7-5p	IRS2
hsa-miR-30c-5p	IRS2
hsa-miR-4690-5p	IRX4
hsa-miR-27b-3p	ISL1
hsa-let-7i-5p	ISLR
hsa-let-7a-5p	ISLR
hsa-miR-6510-5p	ITCH
hsa-miR-17-5p	ITCH
hsa-miR-762	ITCH
hsa-miR-22-3p	ITGA10
hsa-miR-149-3p	ITGA3
hsa-miR-92b-3p	ITGA5
hsa-miR-22-3p	ITGA5
hsa-miR-30c-5p	ITGA5
hsa-miR-762	ITGA5
hsa-miR-142-5p	ITGAV
hsa-let-7i-5p	ITGB3
hsa-let-7a-5p	ITGB3
hsa-miR-150-5p	ITGB3
hsa-let-7i-5p	ITGB8
hsa-let-7a-5p	ITGB8
hsa-miR-17-5p	ITGB8
hsa-miR-7-5p	ITGB8
hsa-miR-22-3p	ITGB8
hsa-miR-106a-5p	ITGB8
hsa-miR-17-5p	ITPKB
hsa-miR-106a-5p	ITPKB
hsa-miR-7-5p	ITPKC
hsa-miR-27b-3p	ITSN2
hsa-miR-762	IVD
hsa-miR-30c-5p	JAG2
hsa-miR-17-5p	JAK1
hsa-miR-106a-5p	JAK1
hsa-miR-142-5p	JARID2
hsa-miR-27b-3p	JAZF1
hsa-miR-6510-5p	JDP2
hsa-miR-762	JDP2
hsa-miR-27b-3p	JHDM1D
hsa-miR-27b-3p	JMJD1C
hsa-miR-92b-3p	JOSD1
hsa-miR-149-3p	JPH2
hsa-miR-7150	JPH2
hsa-miR-149-3p	JPH4
hsa-miR-149-3p	KALRN
hsa-miR-92b-3p	KALRN
hsa-miR-22-3p	KALRN
hsa-miR-17-5p	KAT2B
hsa-miR-106a-5p	KAT2B
hsa-let-7i-5p	KATNAL1
hsa-let-7a-5p	KATNAL1
hsa-miR-27b-3p	KBTBD11
hsa-miR-7-5p	KBTBD2
hsa-miR-149-3p	KCNA6
hsa-let-7i-5p	KCNC1
hsa-let-7a-5p	KCNC1
hsa-miR-149-3p	KCNC1
hsa-miR-7150	KCNC1
hsa-miR-762	KCNC1
hsa-let-7i-5p	KCNC4
hsa-miR-92b-3p	KCNC4
hsa-miR-4690-5p	KCNH1
hsa-miR-7150	KCNH1
hsa-miR-22-3p	KCNH1
hsa-miR-149-3p	KCNIP1
hsa-miR-6510-5p	KCNIP1
hsa-miR-4443	KCNIP1
hsa-miR-762	KCNIP3
hsa-miR-6510-5p	KCNJ10
hsa-miR-30c-5p	KCNJ12
hsa-miR-17-5p	KCNK10
hsa-miR-106a-5p	KCNK10
hsa-miR-149-3p	KCNK15
hsa-miR-27b-3p	KCNK2
hsa-miR-4690-5p	KCNK3
hsa-miR-6510-5p	KCNK3
hsa-miR-92b-3p	KCNK3
hsa-miR-762	KCNN4
hsa-miR-762	KCNQ1
hsa-miR-149-3p	KCNQ4
hsa-miR-22-3p	KCTD10
hsa-miR-146a-5p	KCTD15
hsa-let-7a-5p	KCTD16
hsa-let-7i-5p	KCTD21
hsa-let-7a-5p	KCTD21
hsa-miR-30c-5p	KCTD5
hsa-miR-4443	KDM2A
hsa-miR-7-5p	KDM3B
hsa-miR-762	KDM4A
hsa-miR-1246	KDM5A
hsa-miR-7150	KDM6A
hsa-miR-149-3p	KDM6B
hsa-miR-22-3p	KDM6B
hsa-miR-762	KDM6B
hsa-miR-7150	KIAA0182
hsa-miR-7-5p	KIAA0182
hsa-miR-149-3p	KIAA0195
hsa-miR-6510-5p	KIAA0226
hsa-miR-17-5p	KIAA0226
hsa-miR-22-3p	KIAA0226
hsa-miR-106a-5p	KIAA0226
hsa-miR-4690-5p	KIAA0240
hsa-miR-17-5p	KIAA0240
hsa-miR-106a-5p	KIAA0240
hsa-miR-149-3p	KIAA0247
hsa-miR-7-5p	KIAA0247
hsa-miR-30c-5p	KIAA0247
hsa-miR-27b-3p	KIAA0319L
hsa-miR-22-3p	KIAA0556
hsa-miR-762	KIAA0556
hsa-let-7i-5p	KIAA0895L
hsa-miR-27b-3p	KIAA1033
hsa-miR-7150	KIAA1045
hsa-miR-762	KIAA1045
hsa-miR-92b-3p	KIAA1109
hsa-miR-27b-3p	KIAA1147
hsa-miR-17-5p	KIAA1191
hsa-miR-106a-5p	KIAA1191
hsa-miR-30c-5p	KIAA1211
hsa-let-7a-5p	KIAA1274
hsa-miR-4267	KIAA1274
hsa-miR-17-5p	KIAA1462
hsa-miR-106a-5p	KIAA1462
hsa-let-7i-5p	KIAA1467
hsa-let-7a-5p	KIAA1467
hsa-miR-6510-5p	KIAA1522
hsa-let-7a-5p	KIAA1539
hsa-miR-27b-3p	KIAA1549
hsa-miR-27b-3p	KIAA1737
hsa-miR-762	KIAA1949
hsa-miR-17-5p	KIAA2018
hsa-miR-7-5p	KIAA2018
hsa-miR-27b-3p	KIAA2018
hsa-miR-106a-5p	KIAA2018
hsa-miR-7-5p	KIF16B
hsa-miR-149-3p	KIF17
hsa-miR-7-5p	KIF1B
hsa-miR-762	KIF1B
hsa-miR-149-3p	KIF21B
hsa-miR-17-5p	KIF23
hsa-miR-106a-5p	KIF23
hsa-miR-17-5p	KIF26B
hsa-miR-106a-5p	KIF26B
hsa-miR-149-3p	KIF2C
hsa-miR-17-5p	KIF3B
hsa-miR-92b-3p	KIF3B
hsa-miR-106a-5p	KIF3B
hsa-miR-762	KIF3C
hsa-miR-17-5p	KIF5A
hsa-miR-106a-5p	KIF5A
hsa-miR-22-3p	KIRREL3
hsa-miR-27b-3p	KITLG
hsa-miR-4690-5p	KLC2
hsa-miR-762	KLC2
hsa-miR-7150	KLF12
hsa-miR-7-5p	KLF12
hsa-miR-7-5p	KLF4
hsa-miR-146a-5p	KLF7
hsa-let-7i-5p	KLF9
hsa-let-7a-5p	KLF9
hsa-miR-30c-5p	KLF9
hsa-miR-7150	KLHDC10
hsa-miR-4690-5p	KLHDC3
hsa-miR-4267	KLHDC5
hsa-miR-22-3p	KLHDC5
hsa-let-7a-5p	KLHDC8B
hsa-miR-17-5p	KLHL12
hsa-miR-106a-5p	KLHL12
hsa-miR-762	KLHL18
hsa-miR-150-5p	KLHL3
hsa-let-7i-5p	KLHL31
hsa-let-7a-5p	KLHL31
hsa-miR-17-5p	KLRAQ1
hsa-miR-106a-5p	KLRAQ1
hsa-miR-7-5p	KPNA1
hsa-miR-17-5p	KPNA2
hsa-miR-106a-5p	KPNA2
hsa-miR-27b-3p	KPNA3
hsa-miR-4443	KPNA3
hsa-miR-149-3p	KPNA6
hsa-miR-27b-3p	KPNA6
hsa-miR-27b-3p	KRAS
hsa-let-7i-5p	KREMEN1
hsa-miR-4690-5p	KREMEN1
hsa-miR-6510-5p	KRT71
hsa-miR-149-3p	KRT80
hsa-miR-7150	KRT80
hsa-miR-149-3p	KSR2
hsa-miR-6510-5p	KSR2
hsa-miR-4267	KSR2
hsa-miR-22-3p	KSR2
hsa-miR-4267	KY
hsa-let-7a-5p	L2HGDH
hsa-miR-762	LAD1
hsa-miR-22-3p	LAMC1
hsa-miR-92b-3p	LAMP2
hsa-miR-17-5p	LAPTM4A
hsa-miR-106a-5p	LAPTM4A
hsa-miR-27b-3p	LAPTM4B
hsa-miR-4690-5p	LAPTM5
hsa-miR-762	LAPTM5
hsa-miR-6510-5p	LARP1
hsa-miR-149-3p	LASP1
hsa-miR-27b-3p	LASP1
hsa-miR-22-3p	LAT
hsa-miR-27b-3p	LBH
hsa-let-7a-5p	LBR
hsa-miR-30c-5p	LCLAT1
hsa-let-7a-5p	LCORL
hsa-let-7i-5p	LDB3
hsa-miR-17-5p	LDLR
hsa-miR-106a-5p	LDLR
hsa-miR-762	LDLRAD2
hsa-miR-17-5p	LDLRAD3
hsa-miR-106a-5p	LDLRAD3
hsa-miR-7-5p	LEMD3
hsa-miR-149-3p	LENG8
hsa-miR-762	LHX3
hsa-miR-17-5p	LHX6
hsa-miR-106a-5p	LHX6
hsa-miR-30c-5p	LHX8
hsa-miR-17-5p	LIF
hsa-miR-106a-5p	LIF
hsa-miR-30c-5p	LIMCH1
hsa-miR-7-5p	LIMD1
hsa-miR-4443	LIMD1
hsa-let-7i-5p	LIMD2
hsa-let-7a-5p	LIMD2
hsa-miR-762	LIMD2
hsa-let-7i-5p	LIMK2
hsa-let-7a-5p	LIMK2
hsa-miR-27b-3p	LIMK2
hsa-let-7i-5p	LIN28B
hsa-let-7a-5p	LIN28B
hsa-let-7i-5p	LIPH
hsa-miR-30c-5p	LMLN
hsa-miR-6510-5p	LMNA
hsa-miR-762	LMOD1
hsa-miR-149-3p	LMTK3
hsa-let-7i-5p	LMX1A
hsa-let-7a-5p	LMX1A
hsa-miR-149-3p	LMX1B
hsa-miR-762	LMX1B
hsa-let-7i-5p	LOR
hsa-let-7a-5p	LOR
hsa-miR-762	LOXL1
hsa-miR-27b-3p	LPCAT1
hsa-miR-4690-5p	LPCAT3
hsa-let-7a-5p	LPGAT1
hsa-miR-4690-5p	LPHN1
hsa-miR-149-3p	LPHN1
hsa-miR-762	LPHN1
hsa-miR-27b-3p	LPIN1
hsa-miR-1246	LPIN2
hsa-miR-7-5p	LPP
hsa-miR-7150	LPPR2
hsa-miR-30c-5p	LRCH2
hsa-miR-149-3p	LRCH4
hsa-miR-762	LRCH4
hsa-miR-149-3p	LRFN1
hsa-miR-30c-5p	LRFN2
hsa-let-7i-5p	LRIG2
hsa-let-7a-5p	LRIG2
hsa-let-7i-5p	LRIG3
hsa-let-7a-5p	LRIG3
hsa-miR-4690-5p	LRP1
hsa-miR-17-5p	LRP4
hsa-miR-106a-5p	LRP4
hsa-miR-27b-3p	LRP6
hsa-miR-30c-5p	LRP6
hsa-miR-149-3p	LRP8
hsa-miR-4690-5p	LRRC15
hsa-miR-7150	LRRC15
hsa-miR-146a-5p	LRRC15
hsa-miR-17-5p	LRRC20
hsa-miR-106a-5p	LRRC20
hsa-miR-149-3p	LRRC4B
hsa-miR-17-5p	LRRC55
hsa-miR-106a-5p	LRRC55
hsa-miR-7-5p	LRRC59
hsa-let-7i-5p	LRRC8B
hsa-miR-7-5p	LRRC8B
hsa-miR-4690-5p	LRRC8D
hsa-miR-22-3p	LRRN2
hsa-miR-7-5p	LRTM2
hsa-miR-146a-5p	LRTOMT
hsa-miR-6510-5p	LSG1
hsa-let-7i-5p	LSM11
hsa-let-7a-5p	LSM11
hsa-miR-27b-3p	LSM12
hsa-miR-22-3p	LTB4R
hsa-miR-6510-5p	LTF
hsa-miR-92b-3p	LUZP1
hsa-miR-762	LYPD3
hsa-miR-17-5p	LYPD6
hsa-miR-106a-5p	LYPD6
hsa-miR-17-5p	LYSMD3
hsa-miR-106a-5p	LYSMD3
hsa-miR-92b-3p	LYST
hsa-miR-4443	LZTR1
hsa-miR-17-5p	M6PR
hsa-miR-106a-5p	M6PR
hsa-miR-149-3p	MAFF
hsa-miR-4267	MAFF
hsa-miR-6510-5p	MAFG
hsa-miR-762	MAML1
hsa-miR-92b-3p	MAN2A1
hsa-miR-27b-3p	MAN2A1
hsa-miR-27b-3p	MANEAL
hsa-miR-149-3p	MAP1A
hsa-miR-6510-5p	MAP1A
hsa-miR-7150	MAP1B
hsa-miR-7150	MAP2K4
hsa-miR-27b-3p	MAP2K7
hsa-let-7i-5p	MAP3K1
hsa-let-7a-5p	MAP3K1
hsa-miR-17-5p	MAP3K11
hsa-miR-106a-5p	MAP3K11
hsa-miR-22-3p	MAP3K12
hsa-miR-27b-3p	MAP3K12
hsa-miR-17-5p	MAP3K14
hsa-miR-106a-5p	MAP3K14
hsa-miR-17-5p	MAP3K2
hsa-miR-106a-5p	MAP3K2
hsa-miR-149-3p	MAP3K3
hsa-miR-17-5p	MAP3K8
hsa-miR-106a-5p	MAP3K8
hsa-miR-17-5p	MAP3K9
hsa-miR-7-5p	MAP3K9
hsa-miR-106a-5p	MAP3K9
hsa-miR-762	MAP3K9
hsa-miR-149-3p	MAP4
hsa-let-7i-5p	MAP4K3
hsa-let-7a-5p	MAP4K3
hsa-miR-30c-5p	MAP6
hsa-miR-6510-5p	MAP6D1
hsa-miR-150-5p	MAPK13
hsa-miR-22-3p	MAPK14
hsa-let-7a-5p	MAPK1IP1L
hsa-miR-17-5p	MAPK1IP1L
hsa-miR-7150	MAPK1IP1L
hsa-miR-106a-5p	MAPK1IP1L
hsa-miR-17-5p	MAPK4
hsa-miR-106a-5p	MAPK4
hsa-let-7i-5p	MAPK6
hsa-miR-4690-5p	MAPK9
hsa-miR-17-5p	MAPK9
hsa-miR-106a-5p	MAPK9
hsa-miR-27b-3p	MAPKAPK3
hsa-miR-17-5p	MAPRE1
hsa-miR-149-3p	MAPT
hsa-miR-17-5p	MARCH1
hsa-miR-106a-5p	MARCH1
hsa-miR-6510-5p	MARCH3
hsa-miR-92b-3p	MARCH4
hsa-miR-30c-5p	MARCH8
hsa-miR-30c-5p	MARK1
hsa-miR-149-3p	MARK4
hsa-miR-17-5p	MARK4
hsa-miR-106a-5p	MARK4
hsa-let-7a-5p	MARS2
hsa-let-7i-5p	MASP1
[truncated: 2,129 more rows]

## Sheet: list of targeted gene
Gene symbol
AAK1
AASS
AATK
ABCA1
ABCA2
ABCB9
ABCC1
ABCC10
ABCC5
ABCC9
ABCE1
ABCF2
ABCG4
ABHD14B
ABHD2
ABHD5
ABI2
ABL2
ABR
ACAP2
ACCN2
ACE
ACER2
ACOX1
ACP1
ACP2
ACPL2
ACSL4
ACSL5
ACSL6
ACTA1
ACTR10
ACVR1
ACVR1B
ACVR1C
ACVR2A
ACVR2B
ACVRL1
ADAM11
ADAM19
ADAM9
ADAMTS10
ADAMTS14
ADAMTS19
ADAMTS6
ADAMTS8
ADAMTSL1
ADARB1
ADCK2
ADCY1
ADCY3
ADCY6
ADCY9
ADCYAP1R1
ADD1
ADIPOR2
ADM
ADORA2B
ADRA1B
ADRBK1
ADRBK2
AFF1
AFF2
AFF3
AFF4
AGAP2
AGAP3
AGBL5
AGFG2
AGPAT4
AGPAT6
AGPS
AIF1L
AK1
AKAP11
AKAP13
AKAP5
AKAP6
AKIRIN1
AKT2
AKTIP
ALDH1A3
ALDH1L2
ALDH4A1
ALDH7A1
ALG9
ALKBH7
ALPK3
ALPL
ALS2CR8
ALX3
ALX4
AMBRA1
AMMECR1L
AMOT
AMOTL2
AMT
ANGEL1
ANGEL2
ANK1
ANK2
ANK3
ANKFY1
ANKH
ANKIB1
ANKRA2
ANKRD12
ANKRD13B
ANKRD17
ANKRD29
ANKRD40
ANKRD46
ANKRD49
ANKRD50
ANKRD52
ANKRD9
ANKS1A
ANO6
AP2A1
AP3S2
AP4E1
APBA1
APBB2
APC
APC2
APLN
APOOL
APPBP2
APPL2
ARC
ARFGAP2
ARFGEF1
ARFIP2
ARHGAP1
ARHGAP12
ARHGAP20
ARHGAP26
ARHGAP28
ARHGEF10
ARHGEF11
ARHGEF12
ARHGEF15
ARHGEF17
ARHGEF18
ARHGEF6
ARHGEF7
ARID2
ARID3B
ARID4A
ARID4B
ARIH2
ARL1
ARL10
ARL6IP6
ARMC8
ARPC5
ARPP19
ART5
ASB3
ASB6
ASH1L
ASPH
ASXL1
ATAD2
ATAD2B
ATF7
ATG12
ATG2A
ATG2B
ATG4B
ATG7
ATG9A
ATL3
ATP10B
ATP11A
ATP1A2
ATP1B1
ATP1B2
ATP2A2
ATP2B1
ATP2B2
ATP7A
ATP8B4
ATP9A
ATPAF1
ATPIF1
ATRX
ATXN1
ATXN10
ATXN2L
ATXN7
AVEN
AVL9
AXIN1
AXL
B3GAT1
B3GAT3
B3GNT1
B3GNT5
B3GNT7
B4GALNT1
B4GALT3
B4GALT6
BACE1
BACE2
BACH1
BAG2
BAHCC1
BAHD1
BAMBI
BARX2
BASP1
BATF3
BAZ1B
BAZ2A
BAZ2B
BCAM
BCAP29
BCAT1
BCL2L11
BCL2L2
BCL6B
BCL9
BCL9L
BCORL1
BCR
BDNF
BEND3
BEND4
BHLHE41
BICD2
BIN1
BIN3
BMF
BMI1
BMP1
BMPR2
BNC2
BNIP2
BNIP3L
BOLL
BPTF
BRCA1
BRD2
BRD3
BRF2
BRPF1
BRWD1
BRWD3
BSN
BTBD6
BTBD7
BTBD9
BTG2
BVES
BZW1
C1QTNF7
C2CD2
C2CD2L
CA12
CA7
CABLES1
CABLES2
CACNA1C
CACNA1I
CACNB1
CACNB3
CACNB4
CACYBP
CADM3
CALCR
CALM2
CALM3
CALML4
CALU
CAMK1G
CAMK2A
CAMK2B
CAMK2D
CAMK2G
CAMK2N2
CAMKK1
CAMKK2
CAMKV
CAMTA1
CAMTA2
CANT1
CAPN1
CAPN7
CAPRIN2
CASC3
CASK
CASP3
CAV1
CAV3
CBFA2T2
CBFA2T3
CBL
CBX2
CBX5
CBX6
CBX7
CC2D1A
CCBP2
CCDC105
CCDC120
CCDC149
CCDC25
CCDC47
CCDC48
CCDC50
CCDC6
CCDC76
CCDC85C
CCDC93
CCL1
CCL5
CCNC
CCND1
CCND2
CCNE2
CCNF
CCNJ
CCNJL
CCNT2
CCR7
CD200R1
CD28
CD300LG
CD34
CD3EAP
CD69
CD81
CD83
CD86
CDC14B
CDC25A
CDC25B
CDC34
CDC40
CDC42BPB
CDC42EP2
CDC42EP4
CDC42SE1
CDCP1
CDH24
CDH5
CDK5R1
CDK6
CDKN1A
CDR2
CDS1
CDV3
CECR6
CELSR1
CELSR3
CENPQ
CENPV
CEP120
CEP135
CEP350
CEP57
CERCAM
CFL1
CFL2
CGNL1
CHAC1
CHAF1A
CHD2
CHD4
CHD5
CHD9
CHGA
CHIC1
CHMP7
CHRD
CHRDL1
CHRM1
CHRNB2
CHRNE
CHST1
CHST7
CHUK
CIC
CIITA
CIT
CKAP4
CLASP2
CLCN5
CLCNKA
CLCNKB
CLDN12
CLDN19
CLIC4
CLIC5
CLIP2
CLIP3
CLLU1
CLMN
CLN8
CLOCK
CLP1
CLPB
CLPP
CLSTN1
CMIP
CMTM4
CMTM6
CNGB3
CNIH2
CNN1
CNNM1
CNNM3
CNOT2
CNOT3
CNOT4
CNOT6
CNOT6L
CNOT8
CNP
CNRIP1
CNTD2
CNTN2
CNTNAP1
COG7
COIL
COL11A2
COL15A1
COL19A1
COL1A1
COL21A1
COL24A1
COL25A1
COL4A2
COL4A4
COL4A6
COL5A2
COL9A3
COLQ
COMMD10
COPS7B
COPZ2
COQ2
CORO2B
COTL1
COX7A2L
CPA4
CPD
CPEB1
CPEB3
CPEB4
CPLX2
CPM
CPNE5
CRAMP1L
CRB2
CRCT1
CREB1
CREB3L2
CRELD1
CRIPT
CRISPLD2
CRK
CRLS1
CROT
CRTC1
CRTC2
CRTC3
CRY2
CSDC2
CSF1R
CSNK1A1
CSNK1G1
CSRNP3
CSRP2
CTCF
CTDP1
CTDSP1
CTDSP2
CTDSPL
CTDSPL2
CTF1
CTHRC1
CTNS
CTSA
CTSB
CTTNBP2NL
CTXN1
CUEDC1
CUL3
CUL5
CUX1
CX3CL1
CXCL14
CXCR5
CYB561
CYB561D1
CYBB
CYBRD1
CYP19A1
CYP21A2
CYP26B1
CYP27B1
CYP46A1
CYR61
CYTH3
DAGLA
DAPK1
DAPK2
DAZAP2
DBNDD1
DCBLD2
DCP1A
DCP2
DCUN1D2
DCUN1D3
DCUN1D4
DCX
DDHD1
DDI2
DDIT4
DDN
DDX19A
DDX19B
DDX26B
DDX3X
DDX54
DEDD
DEDD2
DEF8
DENND1A
DENND4B
DENND5B
DEPDC1B
DERL3
DES
DEXI
DGKA
DGKE
DGKZ
DHRS11
DHTKD1
DHX57
DHX8
DIAPH1
DICER1
DIDO1
DIP2A
DIP2B
DIRAS1
DISC1
DKK3
DLG3
DLG5
DLGAP2
DLGAP3
DLGAP4
DLL4
DLST
DLX3
DMRTA2
DMTF1
DMWD
DMXL2
DNAJB12
DNAJB2
DNAJB5
DNAJB6
DNAJC16
DNAJC18
DNAJC27
DNAJC30
DND1
DNM2
DNM3
DNMT3A
DOCK3
DOCK4
DOCK5
DOK4
DOT1L
DPF1
DPF2
DPF3
DPM2
DPP3
DPP6
DPP9
DPY19L3
DPYSL2
DPYSL5
DRG2
DSCAML1
DSEL
DSG3
DSTYK
DTX3L
DTX4
DUSP15
DUSP16
DUSP2
DUSP8
DVL2
DVL3
DYNC1LI2
DYRK1A
DZIP1
E2F1
E2F2
E2F5
EARS2
EBF3
ECE2
EDA
EDAR
EDC3
EDNRA
EED
EEF2K
EFNA3
EFNA5
EFNB1
EGFR
EGLN2
EGR2
EHD2
EHD3
EI24
EIF2AK1
EIF2C1
EIF2S1
EIF2S2
EIF4EBP2
EIF4G1
EIF5
EIF5A2
ELAVL2
ELAVL3
ELF4
ELK1
ELK4
ELL
ELOVL1
ELOVL3
ELOVL4
ELOVL7
EMILIN3
EML1
ENG
ENOSF1
ENPP1
ENPP5
ENSA
ENTPD1
ENTPD2
ENTPD4
ENTPD7
EP300
EPB41
EPB41L5
EPHA10
EPHA4
EPHA7
EPHA8
EPHB2
EPHB3
EPHB4
ERBB3
ERBB4
ERC1
ERCC4
EREG
ERF
ERGIC2
ERI3
ERLIN1
ERO1LB
ESPL1
ESPN
ESR1
ETF1
ETNK1
ETV1
ETV6
EXOSC2
EYA1
EYA4
EZH1
EZH2
FA2H
FADS2
FAF2
FAHD1
FAIM2
FAM100A
FAM102A
FAM103A1
FAM104A
FAM105B
FAM116A
FAM117A
FAM117B
FAM118A
FAM123B
FAM123C
FAM124A
FAM125B
FAM126A
FAM126B
FAM129A
FAM131B
FAM134A
FAM134C
FAM13A
FAM155B
FAM160A2
FAM160B1
FAM163A
FAM168B
FAM178A
FAM18B2
FAM26E
FAM40A
FAM40B
FAM45A
FAM53B
FAM53C
FAM57A
FAM57B
FAM60A
FAM70A
FAM83A
FAM84B
FAM91A1
FANCA
FARP1
FAS
FASLG
FAT3
FBN1
FBRS
FBRSL1
FBXL12
FBXL14
FBXL16
FBXL7
FBXO10
FBXO2
FBXO21
FBXO28
FBXO31
FBXO39
FBXO41
FBXO45
FBXO46
FBXO48
FBXW11
FBXW2
FBXW7
FCRL1
FEM1C
FGD1
FGD4
FGD5
FGD6
FGF11
FGF14
FGF7
FGF8
FGFR1
FGFR1OP2
FHDC1
FHOD3
FIBCD1
FIGN
FKBP10
FKBP8
FLRT2
FLRT3
FLT1
FMN1
FMNL2
FMNL3
FNBP4
FNDC3A
FNDC3B
FNDC4
FNDC5
FNIP1
FOSB
FOSL2
FOXI1
FOXJ2
FOXJ3
FOXK2
FOXN3
FOXN4
FOXO1
FOXO4
FOXP1
FOXP2
FOXP4
FRAS1
FREM2
FRMD4A
FRMD4B
FRMD6
FRS2
FRY
FRYL
FTL
FTSJD1
FURIN
FUT9
FXR2
FXYD7
FYCO1
FZD3
FZD4
G2E3
GAB1
GAB2
GABBR1
GABBR2
GABPB1
GABRA1
GABRA3
GALC
GALE
GALNT1
GALNT10
GALNT2
GALNT3
GALNT7
GALNTL4
GAN
GAS7
GATA2
GATAD2A
GATAD2B
GATC
GATM
GCA
GCNT2
GDA
GDAP2
GDF11
GDF6
GDI1
GFOD2
GGA1
GIGYF1
GIGYF2
GIPC1
GIPC3
GIT1
GJA1
GJC1
GK
GLDN
GLIPR2
GLIS1
GLIS2
GLIS3
GLRX
GLT25D2
GLTP
GLTSCR1
GM2A
GMCL1
GNAI2
GNAO1
GNAT1
GNB5
GNG12
GNG5
GNPDA2
GNPTAB
GNRHR
GNS
GOLGA1
GOLGA7B
GOLT1B
GOSR1
GOSR2
GPAM
GPD1
GPD2
GPR107
GPR124
GPR137
GPR137C
GPR162
GPR180
GPR26
GPR6
GPRC5A
GPRC5B
GPX3
GRAMD1A
GRAMD2
GREB1
GREM1
GRHL2
GRIA1
GRIK5
GRIN1
GRIN2A
GRINA
GRIP2
GRM2
GRN
GRP
GRPEL2
GRSF1
GSK3A
GSK3B
GSPT1
GTDC1
GTF3C2
GTPBP1
GUCY1A3
GYG2
H3F3B
HAS2
HAS3
HAUS8
HBEGF
HBP1
HCFC1
HCN1
HCN3
HCN4
HDAC4
HDAC8
HDLBP
HDX
HECTD3
HEG1
HELLS
HELZ
HEMK1
HERC2
HERPUD2
HES2
HIC2
HIF1A
HIF1AN
HINT3
HIP1
HIPK1
HIPK2
HLF
HMBOX1
HMG20A
HMGA1
HMGA2
HMGB3
HMGCL
HNF4A
HNF4G
HNRNPA3
HNRNPU
HOOK3
HORMAD2
HOXA13
HOXB13
HOXB8
HOXC11
HOXD1
HP1BP3
HPCAL4
HPSE2
HS2ST1
HS3ST5
HTR1E
HTR2C
HTR4
HUNK
HYOU1
ICA1
ICK
ICMT
ICOS
IDE
IDS
IER2
IFFO2
IGDCC3
IGDCC4
IGF1
IGF1R
IGF2BP1
IGF2BP2
IGF2BP3
IGFBP5
IGLON5
IGSF1
IGSF8
IKBKE
IKZF2
IKZF4
IL10
IL13
IL1RAP
IL25
IL2RB
IL2RG
IL8
ILDR1
IMPA2
INO80
INO80D
INO80E
INPP5K
INSR
INTS2
INTS6
IP6K1
IPMK
IPO11
IPO5
IPO7
IPO9
IQSEC1
IQSEC2
IRAK1
IRAK2
IRAK4
IRF1
IRF2BP2
IRF4
IRGQ
IRS1
IRS2
IRX4
ISL1
ISLR
ITCH
ITGA10
ITGA3
ITGA5
ITGAV
ITGB3
ITGB8
ITPKB
ITPKC
ITSN2
IVD
JAG2
JAK1
JARID2
JAZF1
JDP2
JHDM1D
JMJD1C
JOSD1
JPH2
JPH4
KALRN
KAT2B
KATNAL1
KBTBD11
KBTBD2
KCNA6
KCNC1
KCNC4
KCNH1
KCNIP1
KCNIP3
KCNJ10
KCNJ12
KCNK10
KCNK15
KCNK2
KCNK3
KCNN4
KCNQ1
KCNQ4
KCTD10
KCTD15
KCTD16
KCTD21
KCTD5
KDM2A
KDM3B
KDM4A
KDM5A
KDM6A
KDM6B
KIAA0182
KIAA0195
KIAA0226
KIAA0240
KIAA0247
KIAA0319L
KIAA0556
KIAA0895L
KIAA1033
KIAA1045
KIAA1109
KIAA1147
KIAA1191
KIAA1211
KIAA1274
KIAA1462
KIAA1467
KIAA1522
KIAA1539
KIAA1549
KIAA1737
KIAA1949
KIAA2018
KIF16B
KIF17
KIF1B
KIF21B
KIF23
KIF26B
KIF2C
KIF3B
KIF3C
KIF5A
KIRREL3
KITLG
KLC2
KLF12
KLF4
KLF7
KLF9
KLHDC10
KLHDC3
KLHDC5
KLHDC8B
KLHL12
KLHL18
KLHL3
KLHL31
KLRAQ1
KPNA1
KPNA2
KPNA3
KPNA6
KRAS
KREMEN1
KRT71
KRT80
KSR2
KY
L2HGDH
LAD1
LAMC1
LAMP2
LAPTM4A
LAPTM4B
LAPTM5
LARP1
LASP1
LAT
LBH
LBR
LCLAT1
LCORL
LDB3
LDLR
LDLRAD2
LDLRAD3
LEMD3
LENG8
LHX3
LHX6
LHX8
LIF
LIMCH1
LIMD1
LIMD2
LIMK2
LIN28B
LIPH
LMLN
LMNA
LMOD1
LMTK3
LMX1A
LMX1B
LOR
LOXL1
LPCAT1
LPCAT3
LPGAT1
LPHN1
LPIN1
LPIN2
LPP
LPPR2
LRCH2
LRCH4
LRFN1
LRFN2
LRIG2
LRIG3
LRP1
LRP4
LRP6
LRP8
LRRC15
LRRC20
LRRC4B
LRRC55
LRRC59
LRRC8B
LRRC8D
LRRN2
LRTM2
LRTOMT
LSG1
LSM11
LSM12
LTB4R
LTF
LUZP1
LYPD3
LYPD6
LYSMD3
LYST
LZTR1
M6PR
MAFF
MAFG
MAML1
MAN2A1
MANEAL
MAP1A
MAP1B
MAP2K4
MAP2K7
MAP3K1
MAP3K11
MAP3K12
MAP3K14
MAP3K2
MAP3K3
MAP3K8
MAP3K9
MAP4
MAP4K3
MAP6
MAP6D1
MAPK13
MAPK14
MAPK1IP1L
MAPK4
MAPK6
MAPK9
MAPKAPK3
MAPRE1
MAPT
MARCH1
MARCH3
MARCH4
MARCH8
MARK1
MARK4
MARS2
MASP1
MAST3
MAVS
MAX
MAZ
MBD2
MBD6
MBOAT1
MBTD1
MBTPS1
MC2R
MCF2
MCF2L
MCM3
MCTP2
MDFI
MDGA1
MDM4
MECP2
MED12L
MED22
MED28
MED29
MED8
MEF2D
MEGF11
MEGF9
MEIS2
MEPCE
METAP1
METAP2
METTL1
METTL8
MEX3A
MEX3B
MFHAS1
MFN2
MFSD4
MFSD5
MFSD8
MGAT3
MGAT4A
MGLL
MIB1
MICAL1
MICAL3
MIDN
MIER2
MINK1
MKL1
MKL2
MKNK1
MKRN1
MLL
MLL2
MLLT4
MLLT6
MMAB
MMD
MMGT1
MMP14
MMP19
MMP2
MNT
MOCS1
MON2
MORF4L1
MOSPD3
MPPED2
MRAP2
MRAS
MRPS27
MRS2
MRVI1
MSI1
MSRB3
MTCH1
MTF1
MTHFR
MTMR2
MTMR3
MTMR4
MTSS1L
MTUS1
MURC
MUS81
MXD4
MYBL2
MYCL1
MYCN
MYLIP
MYLK2
MYLK3
MYLK4
MYNN
MYO10
MYO18A
MYO1B
MYO1D
MYO1F
MYRIP
MYSM1
MYT1L
N4BP1
N4BP3
NAALADL1
NACC1
NAGPA
NAIF1
NAP1L1
NAPEPLD
NAT15
NAV1
NAV3
NBEA
NBL1
NCBP2
NCDN
NCOA1
NCOA3
NCOA7
NCOR1
NCOR2
NCSTN
NDEL1
NDFIP2
NDRG1
NDST1
NDST3
NDUFA4
NDUFA4L2
NECAB1
NEDD4
NEDD4L
NEGR1
NEK9
NEO1
NET1
NETO1
NEURL1B
NEURL4
NEUROD2
NEUROD4
NEUROG2
NF1
NF2
NFAM1
NFASC
NFAT5
NFIA
NFIB
NFIX
NFKBIE
NFYA
NGFR
NHLRC2
NHLRC3
NHP2
NHS
NICN1
NIPAL3
NIPAL4
NKAIN1
NKD1
NKIRAS2
NKTR
NLGN3
NLK
NLN
NME4
NME6
NNAT
NOL4
NOS3
NOTCH1
NOTCH2
NOTCH3
NOVA1
NOX1
NOX4
NPAS3
NPAS4
NPEPL1
NPEPPS
NPHP3
NPLOC4
NPNT
NPTX1
NR1H2
NR2C2
NR2F2
NR3C1
NR4A3
NR5A1
NRAS
NRBF2
NRG3
NRK
NRP2
NSD1
NSF
NTN1
NTN4
NTNG1
NTRK2
NTRK3
NUAK1
NUDCD3
NUDT8
NUFIP2
NUMBL
NUP210
NUP35
NUP98
NUS1
NXF1
NXT2
OAF
OBFC2A
OCRL
ODF1
ODF3L2
OGT
OLFM4
OLFML2A
ONECUT2
OPA1
OPA3
OPN5
OPRL1
OPRM1
ORMDL3
OSBP2
OSBPL5
OSM
OSMR
OSTM1
OTUB1
OTUD4
OXSR1
P2RX1
P2RX4
PACS1
PADI1
PADI2
PAFAH1B1
PAFAH1B2
PAG1
PAIP2
PAIP2B
PAK1
PALM2
PAM
PAN2
PAPD5
PAPOLA
PAPPA
PAQR4
PARD6B
PARP16
PARP6
PATZ1
PAX3
PAX5
PAX6
PAX8
PAX9
PBK
PBX1
PBX2
PBX3
PCDH1
PCDH11X
PCDH19
PCDH7
PCDHA1
PCDHGA1
PCGF1
PCGF3
PCGF5
PCLO
PCMTD1
PCNT
PCYT1B
PDE10A
PDE12
PDE1B
PDE3A
PDE3B
PDE4A
PDE4B
PDE6G
PDE7B
PDE8B
PDGFA
PDGFRA
PDHX
PDK1
PDK4
PDLIM2
PDLIM5
PDP2
PDPK1
PDPR
PDRG1
PDS5A
PDS5B
PDSS1
PDXDC1
PDXP
PDZD4
PEAR1
PEF1
PELI1
PELI2
PELI3
PER3
PEX5L
PFDN1
PFKFB2
PFKFB4
PFN2
PGAM1
PGBD5
PGM2L1
PGP
PHACTR2
PHB
PHC1
PHC2
PHC3
PHF13
PHF15
PHF17
PHF19
PHF21A
PHF8
PHKG2
PHLDB1
PHTF2
PHYHIP
PIGA
PIGH
PIGN
PIGZ
PIK3CD
PIK3R3
PIK3R5
PIK3R6
PIKFYVE
PIM1
PIP4K2B
PIP4K2C
PIP5K1C
PISD
PITPNM3
PKD1
PKD2
PKIB
PKN2
PKNOX1
PKP2
PLA2G15
PLA2G3
PLA2G6
PLAG1
PLAGL2
PLCB3
PLCD3
PLCG1
PLCH1
PLCXD3
PLD2
PLD3
PLDN
PLEKHA6
PLEKHG3
PLEKHG7
PLEKHH1
PLEKHJ1
PLEKHM1
PLEKHO1
PLEKHO2
PLK2
PLP2
PLSCR4
PLXDC1
PLXNA1
PLXNA4
PLXNC1
PLXND1
PM20D2
PMF1
PML
PMM2
PNKD
PNPLA5
PNRC1
PODXL
POGK
POGZ
POLK
POLL
POLQ
POLR2D
POLR2F
POLR3D
POLR3G
POR
POU2F1
POU2F2
POU6F1
PPAP2B
PPARA
PPARG
PPARGC1A
PPARGC1B
PPFIA2
PPFIA3
PPIF
PPIH
PPIL6
PPM1A
PPM1H
PPM1L
PPM1M
PPME1
PPP1CC
PPP1R11
PPP1R12B
PPP1R13B
PPP1R15B
PPP1R16B
PPP1R2
PPP1R3B
PPP1R9A
PPP1R9B
PPP2CB
PPP2R2A
PPP2R3A
PPP2R4
PPP2R5E
PPP3R1
PPP4R1
PPP6C
PQLC2
PRCD
PRELID1
PRELP
PRICKLE2
PRKAA2
PRKAB2
PRKACA
PRKCB
PRKCE
PRLR
PRMT1
PRPF38B
PRPF40B
PRPF4B
PRPH2
PRR3
PRRG4
PRRT1
PRRT2
PRRX1
PRSS22
PRTG
PSD3
PSEN1
PSME3
PSORS1C2
PTAR1
PTCD1
PTCH1
PTCHD2
PTGDR
PTGER3
PTGFRN
PTGIS
PTGS1
PTMS
PTPDC1
PTPN3
PTPN4
PTPN9
PTPRO
PTPRT
PTPRU
PTRF
PVRL1
PVRL2
PXN
PXT1
PYDC1
QARS
QKI
QSER1
QTRTD1
RAB10
RAB11B
RAB11FIP1
RAB11FIP4
RAB11FIP5
RAB15
RAB22A
RAB24
RAB3GAP2
RAB40C
RAB43
RAB4B
RAB5B
RAB6B
RAB7A
RABEP1
RAD21
RAD23B
RAD9A
RAG1
RAI14
RALB
RALGDS
RALGPS1
RANBP10
RANBP2
RAP1GAP
RAPGEF2
RAPGEF5
RAPGEF6
RAPGEFL1
RAPH1
RARA
RARG
RASA1
RASGEF1A
RASGRF1
RASGRP3
RASL10B
RASSF2
RAVER1
RBBP5
RBCK1
RBL2
RBM14
RBM15
RBM25
RBM47
RBMS1
RBMS2
RBMS3
RC3H1
RCAN2
RCBTB1
RCC2
RCE1
RCOR1
RCOR3
RCVRN
RDH10
RDX
REEP2
REEP6
RELT
REPS2
RET
RFX2
RFXANK
RGAG4
RGL1
RGS16
RGS17
RGS2
RGS6
RGS7BP
RHO
RHOBTB2
RHOT1
RIC8B
RICTOR
RIMKLA
RIMS3
RIMS4
RIOK3
RIT1
RLIM
RNASEL
RND2
RND3
RNF10
RNF141
RNF150
RNF165
RNF169
RNF182
RNF20
RNF207
RNF216
RNF222
RNF38
RNF44
RNF5
RNF6
RNF8
RNGTT
RNMT
ROM1
RORA
RPA2
RPGRIP1L
RPS6KA2
RPS6KA3
RPS6KA5
RPS6KB1
RPS6KC1
RPUSD3
RRAGD
RRAS2
RRBP1
RRM2
RSBN1
RSPO2
RSRC2
RSU1
RTCD1
RTF1
RTKN2
RTN2
RTN3
RUFY2
RUFY3
RUNDC1
RUNX1
RUNX1T1
RUVBL2
RXFP2
S1PR1
S1PR2
SACS
SALL1
SAMD10
SAMD12
SAMD4A
SAP30L
SAR1B
SARM1
SASH1
SATB2
SBF2
SBK1
SC4MOL
SCAMP2
SCAMP5
SCARA3
SCD
SCD5
SCN1A
SCN2A
SCN2B
SCN3B
SCN4B
SCNN1A
SCRT1
SCRT2
SCUBE3
SCYL3
SDC2
SDC3
SEC14L1
SEC24A
SEC24C
SEC31B
SEC62
SEL1L
SEMA3A
SEMA3D
SEMA4C
SEMA4F
SEMA4G
SEMA5A
SEMA6A
SEMA6B
SEMA6D
SENP1
SENP5
SENP7
SEPT2
SEPT4
SEPT6
SEPT9
SEPW1
SERBP1
SERF2
SERP1
SERPINE1
SERTAD3
SESN2
SESTD1
SETD1A
SETD5
SETD7
SETD8
SFMBT1
SFN
SFRP1
SFXN2
SFXN5
SGK1
SGSM2
SGTB
SH2B1
SH2D5
SH3D19
SH3GLB1
SH3PXD2A
SH3RF2
SH3TC2
SHANK2
SHANK3
SHB
SHE
SHF
SHISA4
SHOC2
SHOX
SIAH2
SIAH3
SIDT2
SIGMAR1
SIM2
SIN3A
SIPA1L3
SIRPA
SIRT1
SIRT7
SKP1
[truncated: 609 more rows]
